# Supplementary material for: Mildly Elevated Serum Bilirubin Levels Are Negatively Associated with Carotid Atherosclerosis among Elderly Persons
Source: PLoS One. 2014 Dec 5;9(12):e114281. doi: 10.1371/journal.pone.0114281 (PMC4257609; doi:10.1371/journal.pone.0114281)
Supplement: Data S1 — Data of subjects. (PDF) [file pone.0114281.s002.pdf]

## Sheet: Excel data-TBil and IMT
data No.	mean IMT	age	gender	BMI	smoker	SBP	DBP	Antihypertensive	lnTG	HDL-C	LDL-C	Antidyslipidemic	lnFPG	Antidiabetic	eGFR	LnT-Bil	LnALT	LnGGT	CVD	Ischemic brain	Ischemic heart	TG	FPG	T-Bil	GGT	ALT	T-Bil quartile	MIMT thickness+plaque	plaque	medication
1	1	77	1	22.2	3	118	68	1	5.02	45	127	0	4.7	0	70.23	-1.31	2.71	3.3	1	1	0	152	110	0.27	27	15	1	1	1	1
2	0.95	89	2	15.98	0	174	100	0	4.04	43	100	0	5.36	1	54.96	-0.13	2.2	2.08	1	1	0	57	212	0.88	8	9	3	1	1	1
3	1.08	86	2	13.65	0	124	81	0	3.97	57	67	0	4.79	0	50.28	-0.87	2.71	2.48	1	1	0	53	120	0.42	12	15	1	1	0	0
4	0.93	79	1	24.53	0	146	76	1	4.42	25	133	0	4.43	1	30.98	-0.53	2.08	2.77	0	0	0	83	84	0.59	16	8	2	0	0	1
5	0.83	67	2	19.15	0	138	73	0	4.06	61	146	0	4.72	0	73.66	0.08	2.3	2.64	0	0	0	58	112	1.08	14	10	4	0	0	0
6	1	68	1	28.04	0	109	59	1	5.34	40	129	0	5.35	1	59.75	-0.07	3	3.71	0	0	0	209	211	0.93	41	20	3	1	1	1
7	2.13	77	2	29.49	0	140	68	1	4.76	32	92	0	5.23	1	54.08	-1.2	3.14	2.77	1	1	0	117	186	0.3	16	23	1	1	1	1
8	0.88	86	2	24.54	0	114	67	1	4.19	55	111	0	4.62	1	53.91	-0.62	2.2	3.22	1	1	0	66	102	0.54	25	9	2	1	1	1
9	1.23	72	1	23.17	3	154	78	0	3.71	43	109	0	4.95	0	77.88	0.1	3.56	4.01	1	1	0	41	141	1.1	55	35	4	1	1	0
10	1.2	61	1	23.71	3	160	97	0	5.08	36	89	0	4.97	0	65.32	0.29	3.14	3.78	1	1	0	160	144	1.33	44	23	4	1	0	0
11	1.18	77	2	24.88	0	138	58	1	4.62	51	119	0	5.02	1	44.1	0.01	2.83	2.89	0	0	0	102	152	1.01	18	17	4	1	0	1
12	1.18	75	1	22.46	0	170	97	1	3.69	55	102	0	4.41	0	52.18	-0.42	2.48	2.83	1	1	0	40	82	0.66	17	12	2	1	0	1
13	1.03	73	2	21.91	0	133	62	0	4.16	71	149	0	4.74	0	68.19	-0.67	2.56	3.09	0	0	0	64	115	0.51	22	13	1	1	0	0
14	0.85	84	2	18.49	0	130	64	0	4.16	41	106	0	4.29	0	62.29	-0.37	2.3	2.83	0	0	0	64	73	0.69	17	10	3	1	1	0
15	0.93	76	1	15.71	2	105	55	0	3.58	77	94	0	5.11	1	109.84	-0.4	2.89	3.4	0	0	0	36	166	0.67	30	18	2	0	0	1
16	0.85	76	2	20.44	0	155	83	0	3.85	89	102	0	4.58	0	90.28	-0.56	3.09	3.89	1	1	0	47	98	0.57	49	22	2	0	0	0
17	1.18	89	1	16.96	0	149	78	0	4.22	29	62	0	4.8	0	50.19	-1.47	3.04	3.43	1	1	0	68	121	0.23	31	21	1	1	1	0
18	1.03	79	1	22.98	0	150	72	0	4.25	72	151	1	4.86	0	93.39	0.23	2.08	2.2	0	0	0	70	129	1.26	9	8	4	1	0	1
19	1	75	2	25.45	0	116	73	1	4.22	56	114	0	4.43	0	60.4	-0.13	2.71	2.71	0	0	0	68	84	0.88	15	15	3	1	0	1
20	1.15	78	1	20.31	0	162	87	1	4.45	38	47	0	4.95	0	37.86	-1.14	2.48	2.71	1	1	0	86	141	0.32	15	12	1	1	0	1
21	1.15	77	2	24.77	0	154	86	1	5.24	49	88	0	4.82	0	45.69	-0.71	2.77	2.4	1	1	0	189	124	0.49	11	16	1	1	0	1
22	0.93	80	2	20.72	0	122	73	1	4.54	77	153	0	4.51	0	41.21	0.07	2.71	3.37	0	0	0	94	91	1.07	29	15	4	1	1	1
23	1.05	82	1	23.93	1	199	76	1	4.56	43	187	0	4.51	0	55.37	0.09	3.09	3.3	0	0	0	96	91	1.09	27	22	4	1	0	1
24	0.8	69	2	18.67	0	140	79	0	3.81	76	68	0	4.87	0	71.75	-0.6	2.89	2.4	0	0	0	45	130	0.55	11	18	2	0	0	0
25	0.83	72	2	25.27	0	114	54	0	4.91	58	108	0	4.66	0	82.44	-0.78	2.94	2.64	0	0	0	136	106	0.46	14	19	1	0	0	0
26	1.08	75	2	20.91	0	139	65	0	4.8	67	119	0	4.6	0	53.01	-0.65	2.71	2.94	0	0	0	122	99	0.52	19	15	2	1	0	0
27	0.9	82	2	21.79	0	117	81	1	5.07	31	183	0	5.39	1	64.84	-0.48	2.71	2.94	1	1	0	159	219	0.62	19	15	2	0	0	1
28	1.21	68	1	23.13	3	133	90	0	4.74	40	102	0	5.02	1	75.84	-0.17	2.94	3.04	0	0	0	115	151	0.84	21	19	3	1	0	1
29	0.78	72	2	25.14	0	132	72	0	4.68	50	175	0	4.47	0	46.03	-0.33	2.48	2.4	1	1	1	108	87	0.72	11	12	3	1	1	0
30	0.93	75	2	19.95	0	147	85	1	4.06	46	90	0	4.73	0	90.62	-0.17	3.04	2.89	1	1	0	58	113	0.84	18	21	3	1	1	1
31	0.83	84	2	21.95	0	136	84	1	4.52	58	132	0	4.62	0	44.56	-0.31	2.48	2.3	0	0	0	92	101	0.73	10	12	3	0	0	1
32	0.73	72	2	27.03	0	168	98	1	4.56	44	129	0	4.53	0	70.88	0.25	1.79	2.83	0	0	0	96	93	1.29	17	6	4	0	0	1
33	1.55	79	1	19.85	3	186	98	1	4.54	45	146	0	5.05	0	60.65	-0.39	3.3	3.85	0	0	0	94	156	0.68	47	27	2	1	1	1
34	1.03	77	2	19.62	0	132	83	1	3.89	41	78	0	4.53	0	61.85	-0.62	2.89	2.48	0	0	0	49	93	0.54	12	18	2	0	0	1
35	0.75	69	1	22.14	3	148	76	1	4.48	94	107	0	4.6	0	61.58	0.39	2.77	3.37	0	0	0	88	99	1.48	29	16	4	0	0	1
36	1.2	90	2	21.35	0	120	54	1	4.3	51	111	0	5.18	0	59.14	0.07	2.64	3.3	1	1	0	74	177	1.07	27	14	4	1	1	1
37	0.95	70	2	24.39	0	143	88	1	4.42	63	113	0	4.61	0	49.95	-0.73	2.64	2.4	1	0	0	83	100	0.48	11	14	1	0	0	1
38	1	80	2	18.7	0	199	107	1	5.49	60	93	0	4.62	0	41.21	-0.62	2.56	2.83	1	1	0	243	102	0.54	17	13	2	1	1	1
39	1	75	2	18.4	3	170	99	1	4.2	34	66	0	4.33	0	52.29	0.03	3.09	3.66	1	1	0	67	76	1.03	39	22	4	1	1	1
40	1.38	70	1	18.11	3	156	74	0	4.23	61	109	0	5.18	1	79.67	-0.97	3.58	3.3	0	0	0	69	177	0.38	27	36	1	1	1	1
41	0.88	93	2	21	0	156	76	0	3.78	48	90	0	4.34	0	109.36	-0.21	2.3	2.56	0	0	0	44	77	0.81	13	10	3	1	1	0
42	1.08	81	2	24.45	0	153	80	1	4.55	43	96	0	4.67	1	78.12	0.02	2.56	3.89	0	0	0	95	107	1.02	49	13	4	1	0	1
43	0.95	86	1	22.29	0	111	53	0	3.74	51	75	0	4.53	1	99.92	0.01	2.4	2.83	1	1	0	42	93	1.01	17	11	3	0	0	1
44	0.78	82	2	19.51	0	129	58	0	4.62	93	106	0	4.83	0	68.28	-0.16	2.56	2.71	0	0	0	102	125	0.85	15	13	3	0	0	0
45	0.77	70	2	22.23	0	138	84	0	5.57	58	182	1	5.34	1	64.59	-0.03	3.14	3.47	0	0	0	263	209	0.97	32	23	4	0	0	1
46	1.05	79	2	22.38	0	149	57	1	5.05	39	73	1	5.27	1	71.54	-0.56	3.26	3.74	0	0	0	156	194	0.57	42	26	2	1	0	1
47	0.93	89	1	21.91	0	144	69	1	4.42	55	93	0	4.79	0	32.89	-0.62	1.79	2.77	1	1	1	83	120	0.54	16	6	1	1	1	1
48	0.8	66	2	30.82	0	144	87	1	4.16	52	131	0	4.81	0	51.46	0.44	2.71	3.14	0	0	0	64	123	1.55	23	15	4	0	0	1
49	1.08	73	1	22.58	3	160	91	0	4.49	56	194	0	4.86	1	89.22	-0.04	3.69	3	0	0	0	89	129	0.96	20	40	3	1	1	1
50	1.13	78	1	16.67	3	103	71	0	3.85	74	59	0	4.45	0	63.9	0.53	2.56	3.14	0	0	0	47	86	1.7	23	13	4	1	1	0
51	0.9	70	2	19.58	0	119	65	1	4.51	80	83	1	4.62	1	59.76	0.17	1.39	2.71	1	1	0	91	102	1.18	15	4	4	0	0	1
52	0.8	80	1	16.8	3	140	82	1	4.06	52	107	0	4.84	0	54.56	0.08	2.2	2.77	1	1	0	58	127	1.08	16	9	4	1	1	1
53	1.8	90	1	18.49	0	138	88	0	3.71	60	79	0	5.04	0	80.03	-0.84	3.14	2.89	1	1	0	41	155	0.43	18	23	1	1	1	0
54	1.33	76	2	18.38	0	121	59	1	3.95	44	82	0	5.53	0	64.11	-0.65	2.56	3.14	0	0	0	52	252	0.52	23	13	2	1	1	1
55	0.68	60	2	20.45	0	122	87	1	4.06	60	102	0	4.32	0	81.88	-0.45	3.26	3.56	0	0	0	58	75	0.64	35	26	2	0	0	1
56	0.95	79	2	26.25	0	130	86	1	4.06	49	112	0	4.63	0	56.87	0.33	2.08	2.2	0	0	0	58	103	1.39	9	8	4	0	0	1
57	0.83	70	1	21.55	0	167	95	0	4.23	51	133	0	4.75	1	96.69	-0.16	2.56	3.43	0	0	0	69	116	0.85	31	13	3	1	1	1
58	1.03	89	2	20.62	0	105	90	0	4.51	57	117	0	4.87	0	64.42	-1.56	2.64	2.56	0	0	0	91	130	0.21	13	14	1	1	1	0
59	1.13	75	2	20.27	0	136	76	0	4.41	61	137	0	4.79	0	83.17	-0.54	2.2	3.18	0	0	0	82	120	0.58	24	9	2	1	1	0
60	1.08	72	2	21.35	0	136	84	1	4.52	69	110	0	4.5	0	74.83	0.05	2.4	2.77	1	1	0	92	90	1.05	16	11	4	1	0	1
61	1.23	86	2	25.98	0	136	82	1	4.86	46	131	0	5.01	0	60.88	-0.42	3.26	3.37	1	1	0	129	150	0.66	29	26	2	1	1	1
62	1.15	88	2	19.15	0	80	56	1	3.74	64	72	0	4.83	0	66.91	-0.04	2.64	2.3	1	1	0	42	125	0.96	10	14	4	1	1	1
63	1.25	73	2	22.84	0	155	95	0	4.91	58	96	0	4.65	0	61.82	-0.67	2.4	2.2	1	1	0	136	105	0.51	9	11	1	1	1	0
64	0.73	90	2	17.31	0	114	64	1	3.89	40	61	1	4.76	0	80.59	-0.6	3.22	3.3	1	1	0	49	117	0.55	27	25	2	1	1	1
65	1.2	78	2	21.01	0	135	84	0	4.37	72	113	0	4.65	0	39.75	0.3	3.22	2.56	0	0	0	79	105	1.35	13	25	4	1	1	0
66	1	72	1	26.02	3	126	73	0	4.48	59	141	0	5.02	1	67.05	0.26	3.18	3.47	0	0	0	88	151	1.3	32	24	4	0	0	1
67	0.93	72	2	16.96	0	157	84	0	5.19	62	109	1	4.98	1	51.51	-0.63	2.3	2.83	0	0	0	179	145	0.53	17	10	2	0	0	1
68	0.85	73	1	20.93	0	139	83	1	4.01	38	58	0	4.81	1	76.46	-0.87	2.2	3.43	1	0	1	55	123	0.42	31	9	1	1	1	1
69	0.95	78	2	25.29	0	112	80	1	5	46	164	0	6.89	0	44.72	-0.17	3.74	3.09	1	1	0	149	87	0.84	22	42	3	1	1	1
70	1.68	87	2	18.71	0	123	63	0	4.28	61	89	0	4.95	0	88.82	-0.53	2.77	2.4	0	0	0	72	141	0.59	11	16	2	1	1	0
71	0.98	71	2	17.71	0	103	64	0	3.26	75	69	0	4.65	0	65.37	-0.22	2.89	2.89	1	0	1	26	105	0.8	18	18	3	0	0	0
72	0.95	78	2	17.16	0	96	53	1	3.76	53	86	0	5.02	0	57.08	0.13	2.48	2.77	0	0	0	43	151	1.14	16	12	4	0	0	1
73	1.6	88	2	18.61	0	121	62	1	4.37	61	144	0	5.02	0	48.63	-0.69	3.09	2.64	0	0	0	79	152	0.5	14	22	1	1	1	1
74	0.88	85	2	23.11	0	149	63	1	4.49	50	89	0	4.63	0	77.05	-0.92	1.95	2.48	1	1	0	89	103	0.4	12	7	1	1	1	1
75	0.93	83	1	22.54	0	167	84	0	4.67	79	121	0	4.63	0	71.63	-0.39	3.04	2.89	0	0	0	107	103	0.68	18	21	2	0	0	0
76	1	73	2	14.74	0	117	74	1	4.32	85	200	0	4.64	0	59.05	-0.26	2.56	3.04	0	0	0	75	104	0.77	21	13	3	1	0	1
77	0.83	66	2	18.33	0	122	61	1	4.06	91	112	0	4.87	1	65.69	-0.42	2.89	2.83	0	0	0	58	130	0.66	17	18	2	1	1	1
78	0.73	73	2	20.86	0	123	78	1	3.56	43	52	0	4.75	0	67.04	-0.19	3.4	3.33	0	0	0	35	116	0.83	28	30	3	0	0	1
79	1.58	96	1	20.27	1	118	67	0	4.26	46	78	0	4.56	0	71.71	0.69	2.2	2.48	1	1	0	71	96	2	12	9	4	1	1	0
80	1.15	95	1	17.65	3	129	66	0	3.85	39	70	0	4.65	0	44.22	-0.37	2.77	2.64	1	1	0	47	105	0.69	14	16	2	1	1	0
81	1.23	85	1	18.75	0	108	84	0	4.16	68	68	0	5.19	0	53.05	-0.76	3.04	3.22	0	0	0	64	179	0.47	25	21	1	1	1	0
82	0.85	82	2	20.44	0	109	71	1	3.91	68	101	0	4.48	0	70.78	-0.48	2.48	3.33	0	0	0	50	88	0.62	28	12	2	1	1	1
83	0.88	60	1	24.3	0	118	78	0	5.09	54	109	0	5.21	1	79.74	0.24	1.95	3.78	0	0	0	162	184	1.27	44	7	4	0	0	1
84	0.95	81	2	21.21	0	140	81	1	4.16	116	93	0	4.45	0	76.59	-0.43	3	3.26	1	1	0	64	86	0.65	26	20	2	1	1	1
85	1.35	83	2	21.74	0	148	67	1	5.39	49	202	0	4.69	0	57.78	-0.82	2.4	2.3	1	1	0	219	109	0.44	10	11	1	1	1	1
86	0.88	87	1	17.66	3	135	70	1	4.28	45	87	0	4.87	0	53.85	-0.54	2.89	3.09	1	1	0	72	130	0.58	22	18	2	1	1	1
87	0.83	78	2	19.68	0	128	61	1	3.97	82	89	1	4.74	0	66.9	-0.21	2.64	2.48	0	0	0	53	115	0.81	12	14	3	0	0	1
88	0.75	83	2	19.2	0	168	77	1	4.52	47	174	0	4.5	0	56.07	-0.2	2.2	2.77	0	0	0	92	90	0.82	16	9	3	0	0	1
89	0.8	81	1	18.22	2	145	87	0	3.53	59	72	0	4.78	0	70.16	0.42	2.2	2.83	0	0	0	34	119	1.52	17	9	4	0	0	0
90	1.23	78	2	24.24	0	182	92	1	4.38	67	115	0	4.43	0	55.44	-0.34	2.3	2.83	0	0	0	80	84	0.71	17	10	3	1	1	1
91	0.95	60	2	23.92	0	154	83	1	4.72	69	147	1	4.47	0	58.92	0	2.56	3.74	0	0	0	112	87	1	42	13	4	0	0	1
92	0.7	75	1	18.46	1	132	73	0	3.87	66	41	0	4.55	0	90.02	0.1	2.08	2.71	0	0	0	48	95	1.11	15	8	4	0	0	0
93	0.85	76	1	26.86	0	141	95	1	5.02	41	100	0	5.53	1	73.46	0.02	3.47	3.43	0	0	0	152	253	1.02	31	32	3	0	0	1
94	0.98	83	2	30.13	0	164	91	1	4.25	67	88	0	5.12	0	62.51	-1.02	2.56	2.64	0	0	0	70	168	0.36	14	13	1	0	0	1
95	0.77	60	1	23.39	3	111	62	1	4.48	46	163	0	4.34	0	71.56	0.07	2.83	3.3	1	1	0	88	77	1.07	27	17	4	0	0	1
96	0.7	73	2	18.94	0	124	81	0	4.94	41	92	0	4.78	0	45.84	-0.97	2.3	2.4	0	0	0	140	119	0.38	11	10	1	0	0	0
97	1.03	89	2	24.34	0	119	82	0	4.64	31	139	0	4.44	0	55.78	-0.76	2.64	2.83	1	1	0	104	85	0.47	17	14	1	1	1	0
98	0.78	70	2	24.87	0	171	77	1	5.42	46	199	0	4.66	1	71.45	-0.62	2.71	3	0	0	0	225	106	0.54	20	15	2	0	0	1
99	0.93	86	2	27.59	0	151	64	1	4.97	58	129	0	4.62	0	55.5	-0.34	2.3	2.48	1	1	0	144	101	0.71	12	10	3	1	1	1
100	0.9	81	1	20.05	3	112	69	1	4.76	59	88	0	4.56	0	56.19	0.02	2.83	2.71	0	0	0	117	96	1.02	15	17	3	1	1	1
101	1.03	72	1	19.99	3	124	65	0	4.61	57	180	0	4.69	0	82.69	-0.15	3.91	4.29	1	1	0	100	109	0.86	73	50	3	1	1	0
102	1.03	68	1	23.27	3	171	77	0	4.89	46	120	0	4.56	0	66.47	0.15	2.94	2.64	1	1	0	133	96	1.16	14	19	4	1	1	0
103	1	74	2	20.36	0	163	72	1	4.01	41	67	0	4.53	0	107.68	-0.62	2.64	2.3	0	0	0	55	93	0.54	10	14	2	1	1	1
104	0.78	77	2	26.82	0	131	53	1	4.29	71	77	0	4.8	0	77.72	-0.36	2.83	2.4	0	0	0	73	122	0.7	11	17	3	1	1	1
105	1	88	2	18.78	0	138	64	0	4.81	50	97	0	5.47	1	66.91	-0.87	2.56	2.56	0	0	0	123	237	0.42	13	13	1	1	0	1
106	0.88	76	2	23.03	0	151	76	0	4.06	65	116	0	5.25	0	73.68	-0.07	1.79	1.79	0	0	0	58	191	0.93	6	6	4	0	0	0
107	1.15	74	1	24.78	1	199	93	0	4.52	60	148	0	4.74	0	72	-0.33	2.89	3.93	1	1	0	92	115	0.72	51	18	2	1	1	0
108	0.7	67	2	23.58	0	123	79	0	3.97	54	82	0	4.63	0	69.89	-0.99	2.64	2.3	0	0	0	53	103	0.37	10	14	1	0	0	0
109	0.68	87	2	19.42	0	155	98	1	4.23	53	119	0	4.81	0	58.79	0.17	1.95	2.56	0	0	0	69	123	1.18	13	7	4	1	1	1
110	1.1	84	1	13.17	3	100	52	0	4.28	55	108	0	4.7	0	91.76	-0.16	3.09	3.26	1	1	0	72	110	0.85	26	22	3	1	1	0
111	1.38	84	2	23.74	0	153	80	1	4.2	50	119	0	4.68	1	59.38	-0.89	2.56	2.64	0	0	0	67	108	0.41	14	13	1	1	1	1
112	1.08	81	1	19.74	3	126	62	0	4.29	49	106	0	5.07	0	63.21	0.34	2.83	3.66	0	0	0	73	159	1.41	39	17	4	1	1	0
113	1.03	86	2	22.19	0	105	65	1	4.41	58	97	0	4.79	0	39.07	0.04	2.71	3	0	0	0	82	120	1.04	20	15	4	1	0	1
114	0.88	76	2	23.54	0	162	84	0	4.11	90	178	0	4.73	0	84.6	-0.27	3.14	2.64	0	0	0	61	113	0.76	14	23	3	1	1	0
115	0.78	81	2	15.26	0	118	73	0	4.08	38	113	0	4.76	0	66.18	-0.39	3.5	3.3	0	0	0	59	117	0.68	27	33	3	0	0	0
116	1.7	89	2	21.86	0	139	79	1	4.36	60	134	0	4.6	0	76.04	-0.54	2.4	2.56	0	0	0	78	99	0.58	13	11	2	1	1	1
117	0.78	81	2	19.82	0	153	81	0	4.39	36	108	0	4.64	0	61.94	0.18	3.4	3.97	0	0	0	81	104	1.2	53	30	4	0	0	0
118	1.33	92	2	22.19	0	152	94	0	3.83	74	109	0	5.44	0	46.18	-0.33	3.22	3.4	1	1	0	46	231	0.72	30	25	3	1	1	0
119	0.88	87	2	30.03	0	117	67	1	4.49	59	146	0	4.68	0	44.12	-0.54	3.22	3.04	0	0	0	89	108	0.58	21	25	2	1	1	1
120	1.13	79	1	23.42	0	130	90	0	5.72	50	233	0	4.33	0	45.77	-0.84	2.4	4.13	0	0	0	305	76	0.43	62	11	1	1	0	0
121	0.98	81	2	24.2	0	155	85	0	4.13	61	88	0	4.89	0	46.71	-0.65	2.71	3.26	0	0	0	62	133	0.52	26	15	2	1	1	0
122	1.55	95	1	23.73	0	137	54	1	4.38	51	85	0	4.93	0	50.3	0.61	3.04	2.48	1	1	0	80	138	1.84	12	21	4	1	1	1
123	0.83	76	1	19.48	2	125	80	1	4.74	46	116	0	4.88	1	43.47	-0.12	2.56	3.4	1	1	0	115	132	0.89	30	13	3	0	0	1
124	1	87	1	19.68	3	113	65	1	4.51	37	122	0	4.91	0	36.13	-0.97	2.3	3.87	1	1	0	91	135	0.38	48	10	1	1	0	1
125	0.85	77	2	19.74	0	113	57	1	4.22	42	61	1	4.8	0	70.77	0.16	2.71	2.56	1	0	1	68	121	1.17	13	15	4	1	1	1
126	0.75	60	1	23.73	2	142	92	0	4.97	72	189	0	4.99	0	73.45	0.03	3.64	3.53	0	0	0	144	147	1.03	34	38	4	0	0	0
127	0.93	87	1	18.3	0	155	71	0	3.69	68	115	0	4.51	0	50.52	-0.65	2.56	2.48	0	0	0	40	91	0.52	12	13	1	0	0	0
128	0.93	79	2	17.33	0	128	68	0	4.45	63	120	0	4.45	0	72.86	-0.24	2.48	2.56	0	0	0	86	86	0.79	13	12	3	0	0	0
129	2.08	80	2	28.28	0	164	78	1	4.41	44	80	0	4.88	0	37.47	0.1	2.08	2.48	0	0	0	82	132	1.11	12	8	4	1	1	1
130	1.03	69	2	24.2	0	106	66	0	4.19	51	156	0	4.74	0	53.56	0.05	2.89	3.18	0	0	0	66	114	1.05	24	18	4	1	0	0
131	1.2	89	1	20.41	0	142	60	1	4.37	37	77	0	4.51	0	46.35	-0.63	2.71	2.89	0	0	0	79	91	0.53	18	15	1	1	1	1
132	0.8	61	2	17.88	0	116	76	0	3.91	69	94	0	5.21	0	63.12	-0.53	2.2	3.09	0	0	0	50	184	0.59	22	9	2	0	0	0
133	1	70	2	20.48	0	148	80	0	4.43	74	136	0	4.91	0	84.83	-0.3	3.56	3.14	0	0	0	84	136	0.74	23	35	3	1	1	0
134	1.03	78	1	17	0	141	83	0	3.74	56	60	0	4.91	0	46.79	-0.69	2.48	2.83	0	0	0	42	136	0.5	17	12	1	1	1	0
135	1.03	86	2	26.85	0	112	53	1	4.6	50	83	0	4.93	0	35.62	-1.08	2.3	2.4	0	0	0	99	138	0.34	11	10	1	1	1	1
136	0.65	64	1	21.86	0	95	62	0	4.55	56	124	0	4.61	0	61.49	-0.13	1.79	2.77	0	0	0	95	100	0.88	16	6	3	0	0	0
137	0.85	74	2	21.2	0	127	61	1	4.16	72	84	1	4.66	0	99.85	0	2.94	2.56	1	1	0	64	106	1	13	19	4	0	0	1
138	0.8	68	2	20.72	0	132	80	1	4.63	84	124	1	4.91	0	49.74	-1.24	3.47	2.89	0	0	0	103	135	0.29	18	32	1	0	0	1
139	0.73	73	1	19	1	137	60	0	4.08	56	63	1	4.52	0	55.41	-0.42	2.56	2.89	1	1	0	59	92	0.66	18	13	2	1	1	1
140	1.1	78	2	20.7	0	112	60	0	4.5	55	110	0	4.66	1	47.22	-0.54	2.4	2.2	0	0	0	90	106	0.58	9	11	2	1	1	1
141	0.7	81	2	13.19	0	140	90	0	4.23	44	148	0	4.76	0	59.08	-0.6	2.4	2.48	0	0	0	69	117	0.55	12	11	2	1	1	0
142	0.78	91	1	18.24	0	149	86	0	3.81	55	66	0	4.53	0	81.06	0.18	2.08	2.2	0	0	0	45	93	1.2	9	8	4	0	0	0
143	0.95	73	2	18.11	0	128	85	0	4.34	74	98	0	5.56	0	75.94	-0.6	2.83	3.78	1	1	0	77	261	0.55	44	17	2	0	0	0
144	1	76	2	26.94	0	132	74	1	4.52	51	134	0	5.1	0	37.27	-0.03	3.26	2.77	0	0	0	92	164	0.97	16	26	4	1	1	1
145	0.83	65	1	24.67	3	139	89	0	4.54	49	141	0	5.28	1	56.68	0.09	3.09	3.5	0	0	0	94	196	1.09	33	22	4	0	0	1
146	1.2	70	1	19.83	0	145	87	1	4.2	69	131	1	4.76	0	52.16	0.41	2.83	3.26	0	0	0	67	117	1.5	26	17	4	1	1	1
147	0.9	70	1	25.22	0	156	81	0	4.22	87	76	0	5.18	0	77.38	-0.29	2.3	3.14	0	0	0	68	177	0.75	23	10	3	0	0	0
148	1.08	65	1	23.88	0	131	68	0	4.71	29	72	0	4.3	0	100.54	-0.04	2.56	3.4	0	0	0	111	74	0.96	30	13	3	1	1	0
149	0.9	82	2	18.25	0	152	81	1	4.37	50	83	0	4.57	0	84.55	-0.42	2.64	2.48	0	0	0	79	97	0.66	12	14	2	1	1	1
150	1.13	93	2	14.84	0	149	89	0	4.25	37	82	0	5.39	0	40.82	-0.06	2.2	1.79	1	0	1	70	220	0.94	6	9	4	1	1	0
151	1.08	90	2	26.68	0	156	80	1	4.96	59	129	0	4.66	0	51.72	-0.2	2.89	2.83	0	0	0	142	106	0.82	17	18	3	1	0	1
152	0.9	78	2	27.61	0	129	69	1	4.51	73	104	0	4.85	0	45.52	-0.3	2.56	2.48	1	1	0	91	128	0.74	12	13	3	0	0	1
153	0.93	87	1	12.82	0	93	59	0	4.01	41	72	0	4.37	0	87.74	-1.43	2.89	3.04	0	0	0	55	79	0.24	21	18	1	1	1	0
154	0.98	87	2	15.56	0	120	82	0	4.45	76	128	0	5.11	0	58.79	-0.62	3.14	2.89	1	0	1	86	166	0.54	18	23	2	1	1	0
155	1.33	82	1	27.97	0	109	55	0	4.48	41	121	0	4.6	0	58.61	-0.22	2.77	2.89	1	1	0	88	99	0.8	18	16	3	1	1	0
156	0.93	84	2	25.43	0	160	90	1	5.3	54	129	0	4.77	0	42.03	-0.2	2.56	2.71	0	0	0	201	118	0.82	15	13	3	1	1	1
157	1.4	80	1	21.47	0	111	78	1	4.93	57	217	0	5.04	0	31.89	-0.62	2.83	3.22	1	1	0	139	154	0.54	25	17	1	1	1	1
158	0.9	82	1	19.73	0	161	94	1	4.44	49	97	0	4.08	0	66.28	-0.65	3.69	3.91	1	1	0	85	59	0.52	50	40	1	1	1	1
159	1.63	87	1	14.76	3	133	81	1	4.39	37	89	0	4.83	1	31.34	-0.71	2.4	2.77	0	0	0	81	125	0.49	16	11	1	1	1	1
160	1.6	85	2	21.63	0	124	62	0	4.17	50	84	0	5.42	0	95.96	0.1	2.48	2.2	0	0	0	65	226	1.11	9	12	4	1	1	0
161	0.95	85	1	15.06	3	95	45	1	4.28	40	68	0	5.26	0	82.66	-0.82	3.09	2.48	0	0	0	72	192	0.44	12	22	1	1	1	1
162	1.13	67	1	23.23	3	165	88	1	5.62	35	106	1	5.33	0	65.13	-0.43	3.71	4.04	0	0	0	275	207	0.65	57	41	2	1	0	1
163	1.1	93	2	17.22	0	136	84	0	4.81	52	92	0	5.41	0	50.52	-0.45	3.71	2.89	0	0	0	123	224	0.64	18	41	2	1	1	0
164	0.88	95	2	19.85	0	106	43	1	4.56	62	124	0	4.88	0	33.3	0	2.4	2.56	0	0	0	96	132	1	13	11	4	1	1	1
165	0.85	79	1	18.67	2	183	85	0	4.42	53	97	0	4.79	0	60.65	-0.51	2.83	2.89	0	0	0	83	120	0.6	18	17	2	1	1	0
166	1.25	86	2	16.53	0	166	88	1	4.19	47	132	0	4.41	0	50.28	-0.97	2.3	2.3	1	1	0	66	82	0.38	10	10	1	1	1	1
167	1.4	92	2	18.43	0	112	75	0	4.66	56	137	0	4.79	0	45.6	-0.54	2.77	3.33	0	0	0	106	120	0.58	28	16	2	1	1	0
168	0.8	63	2	28.15	0	131	71	0	4.19	82	129	0	4.55	0	63.5	-0.4	3.47	3.14	0	0	0	66	95	0.67	23	32	2	0	0	0
169	0.83	78	2	19.15	0	137	64	0	3.97	66	140	0	4.53	0	85.77	-0.15	2.4	2.3	0	0	0	53	93	0.86	10	11	3	0	0	0
170	1	90	2	19.57	0	107	64	0	5.11	59	133	0	4.43	0	40.29	-0.63	3.37	2.89	1	1	0	166	84	0.53	18	29	2	1	1	0
171	1.05	88	2	20.84	0	146	64	0	3.85	50	51	0	4.48	0	69.36	-0.67	3.37	3.64	0	0	0	47	88	0.51	38	29	1	1	1	0
172	1.13	75	2	17.44	0	158	98	1	3.83	83	96	0	4.89	1	55.27	-0.26	3.33	2.4	0	0	0	46	133	0.77	11	28	3	1	1	1
173	1.08	77	1	24.45	3	139	78	1	3.74	73	60	0	5.46	1	78.69	0.63	2.48	3.56	1	1	0	42	234	1.88	35	12	4	1	0	1
174	1.2	83	2	19.81	0	173	87	0	4.16	82	145	0	4.96	0	70.53	0.25	3.18	2.89	1	1	0	64	142	1.29	18	24	4	1	1	0
175	1.05	80	1	27.14	3	149	83	1	4.17	73	103	1	4.88	1	52.29	-0.73	2.71	2.48	1	1	0	65	132	0.48	12	15	1	1	1	1
176	0.8	66	2	22.32	0	115	62	0	5	44	109	0	4.54	0	89.98	-0.53	2.48	3.09	0	0	0	149	94	0.59	22	12	2	0	0	0
177	0.95	78	1	18.87	3	119	85	0	4.28	86	116	0	4.63	0	69.03	-0.22	2.56	3.66	0	0	0	72	103	0.8	39	13	3	0	0	0
178	1.1	84	2	22.46	0	118	59	0	4.2	71	64	0	5.62	1	35.86	-0.62	2.3	3.53	1	1	0	67	277	0.54	34	10	2	1	1	1
179	1.03	85	1	16.01	0	137	69	1	4.36	26	106	0	4.37	0	102.22	-0.49	3.18	3.09	1	1	0	78	79	0.61	22	24	2	1	1	1
180	1.3	70	2	25.45	0	163	73	1	4.55	61	126	0	4.77	0	54.07	-0.22	2.71	3.04	0	0	0	95	118	0.8	21	15	3	1	1	1
181	0.7	70	2	26.16	0	176	94	0	5.15	28	130	0	5.34	0	39.74	-0.78	2.89	3.33	1	1	0	172	208	0.46	28	18	1	0	0	0
182	0.88	82	2	26.08	0	126	58	1	4.54	44	79	0	4.5	0	40.92	-0.46	2.48	2.08	0	0	0	94	90	0.63	8	12	2	1	1	1
183	1.13	70	2	19.29	0	166	86	1	4.01	89	134	0	5.79	1	43.79	-0.2	2.4	2.48	0	0	0	55	326	0.82	12	11	3	1	0	1
184	1.38	71	1	19.52	3	105	80	1	4.25	39	86	0	4.84	0	64.84	-0.69	2.2	2.94	0	0	0	70	127	0.5	19	9	1	1	1	1
185	0.8	83	2	25.78	0	169	79	0	4.68	72	136	0	5.23	0	63.55	-0.25	2.56	2.56	0	0	0	108	186	0.78	13	13	3	1	1	0
186	1.08	81	1	22.23	3	213	114	1	4.09	55	98	0	4.61	0	58.13	-0.51	2.3	2.48	0	0	0	60	100	0.6	12	10	2	1	1	1
187	0.9	71	1	21.36	3	169	75	1	4.29	48	85	0	4.86	0	56.46	0.02	2.94	3	0	0	0	73	129	1.02	20	19	3	0	0	1
188	1.13	87	2	18.65	0	158	93	1	4.08	50	78	0	4.82	0	33.83	-1.14	2.08	3.69	0	0	0	59	124	0.32	40	8	1	1	1	1
189	1.1	80	2	19.88	1	140	76	1	3.97	52	149	0	4.71	0	35.66	0.12	2.48	3.18	1	0	1	53	111	1.13	24	12	4	1	1	1
190	0.75	88	2	15.59	0	118	58	1	4.41	90	141	0	5.14	0	35.74	-0.94	2.2	2.3	1	1	0	82	170	0.39	10	9	1	1	1	1
191	0.85	62	2	22.66	0	120	90	0	3.87	77	66	0	4.88	0	100.17	-0.51	4.33	4.03	0	0	0	48	131	0.6	56	76	2	0	0	0
192	0.8	76	2	21.38	0	133	84	1	4.41	61	189	0	4.53	0	57.51	0.21	3.58	2.64	0	0	0	82	93	1.23	14	36	4	0	0	1
193	0.88	82	1	15.81	3	138	72	0	4.13	51	96	0	4.85	0	79.66	-0.89	2.83	2.83	1	1	0	62	128	0.41	17	17	1	1	1	0
194	0.85	77	1	21.86	0	102	73	1	4.82	67	116	0	4.53	0	52.87	-0.76	2.4	3.14	1	1	0	124	93	0.47	23	11	1	1	1	1
195	0.98	84	1	18.13	3	156	75	1	4.17	56	57	0	4.65	0	68.49	-0.82	2.64	2.48	1	0	1	65	105	0.44	12	14	1	1	1	1
196	0.75	76	2	24.23	0	160	92	1	4.23	77	149	0	5.09	0	49.42	-0.65	2.64	2.89	1	1	0	69	162	0.52	18	14	2	0	0	1
197	1.08	74	1	34.7	0	155	78	1	4.36	58	121	0	4.8	1	67.38	-0.53	2.48	2.64	1	1	0	78	122	0.59	14	12	2	1	1	1
198	0.83	83	2	18.88	0	158	81	1	3.91	43	58	0	4.43	0	76.06	-0.25	1.95	2.08	0	0	0	50	84	0.78	8	7	3	1	1	1
199	0.88	85	1	21.5	0	124	74	0	3.74	62	49	0	4.92	0	50.86	-0.73	2.94	2.64	0	0	0	42	137	0.48	14	19	1	1	1	0
200	1	73	1	23.38	3	153	64	1	4.42	65	58	0	4.83	1	34.81	-0.46	2.64	3.85	1	1	1	83	125	0.63	47	14	2	1	1	1
201	1.15	94	2	14.67	0	114	71	0	4.03	42	69	0	4.66	0	126.68	-0.54	2.77	2.2	1	1	0	56	106	0.58	9	16	2	1	1	0
202	0.98	83	2	29.9	0	121	95	0	4.5	33	109	0	4.73	1	56.07	-0.56	3.47	2.77	0	0	0	90	113	0.57	16	32	2	1	1	1
203	1.2	83	1	24.04	3	156	87	1	4.41	47	122	0	4.41	0	70.64	-0.19	2.56	2.77	1	1	1	82	82	0.83	16	13	3	1	1	1
204	1.2	60	2	19.9	0	128	62	1	3.83	77	77	0	4.98	0	65.4	-0.56	2.4	2.48	0	0	0	46	146	0.57	12	11	2	1	1	1
205	1.05	70	2	24.01	0	118	67	1	5.46	40	125	0	4.58	0	55.58	-0.4	2.71	2.94	0	0	0	236	98	0.67	19	15	2	1	1	1
206	1	82	2	21.32	0	146	65	0	4.69	65	186	0	4.82	0	81.06	-0.14	2.2	2.48	1	1	0	109	124	0.87	12	9	3	1	0	0
207	1.05	81	1	23.77	3	159	98	1	4.48	80	101	0	4.62	0	75.29	-0.42	3.66	3.3	1	1	0	88	102	0.66	27	39	2	1	1	1
208	1	85	1	19.7	3	155	85	0	4.22	53	97	0	5.08	0	65.6	-0.08	2.3	2.3	1	1	0	68	160	0.92	10	10	3	1	1	0
209	0.7	73	2	20.91	0	158	85	0	5.34	35	113	0	4.38	0	65.93	-0.48	2.3	2.3	0	0	0	208	80	0.62	10	10	2	0	0	0
210	1.25	86	1	15.41	0	131	86	0	4.25	35	89	0	4.74	0	88.03	-0.56	1.79	1.95	1	1	0	70	114	0.57	7	6	2	1	1	0
211	0.73	72	2	20.91	0	150	107	0	4.74	31	92	0	4.48	0	67.31	-0.53	3.14	3.93	0	0	0	114	88	0.59	51	23	2	0	0	0
212	0.83	78	2	18.33	0	87	41	0	4.22	77	72	0	5.37	1	57.93	-1.35	2.3	2.3	0	0	0	68	214	0.26	10	10	1	1	1	1
213	0.85	83	2	25.49	0	178	63	0	5.11	55	156	0	4.65	0	31.05	-0.8	2.4	2.77	0	0	0	166	105	0.45	16	11	1	0	0	0
214	1.58	72	2	22.83	0	181	90	1	4.38	56	148	0	4.36	0	32.63	-0.39	2.08	2.4	1	1	0	80	78	0.68	11	8	3	1	1	1
215	1.73	77	1	16.14	3	130	62	1	4.23	21	74	0	4.74	0	63.35	-1.08	2.4	3.09	0	0	0	69	114	0.34	22	11	1	1	1	1
216	0.75	76	1	19.64	0	135	79	1	5.19	58	96	0	4.7	0	32.58	-0.6	2.71	2.56	1	1	0	179	110	0.55	13	15	2	0	0	1
217	1.03	86	2	27.7	0	150	75	0	4.49	46	137	0	4.72	0	66.19	-0.43	2.3	2.56	1	1	0	89	112	0.65	13	10	2	1	1	0
218	1.03	73	2	22.21	0	187	96	1	5.3	50	173	0	5.16	0	63.81	-0.92	3.26	3.47	0	0	0	201	174	0.4	32	26	1	1	1	1
219	1.05	85	2	20.5	0	131	86	0	4.69	43	118	0	5.06	0	81.92	-0.45	2.56	3	0	0	0	109	158	0.64	20	13	2	1	1	0
220	1.1	81	2	25.64	0	101	72	0	5	37	185	0	4.08	0	59.08	-0.21	2.64	2.94	1	1	0	149	59	0.81	19	14	3	1	1	0
221	1.18	89	1	22.02	3	105	48	0	3.93	44	107	0	4.77	0	74.37	-1.2	2.83	2.64	0	0	0	51	118	0.3	14	17	1	1	1	0
222	1	75	2	22.06	0	164	52	0	4.49	68	101	0	4.62	0	78.3	0.35	1.95	2.48	1	1	0	89	102	1.42	12	7	4	0	0	0
223	1.28	74	1	23.44	3	163	83	1	4.96	42	93	1	4.55	0	53.48	-0.27	3.3	3.43	1	1	1	143	95	0.76	31	27	3	1	1	1
224	1.38	85	1	17.33	2	117	65	0	3.64	35	62	0	4.92	0	69.2	0.05	2.64	2.48	0	0	0	38	137	1.05	12	14	4	1	1	0
225	0.93	76	1	25.23	0	128	89	1	4.23	58	64	0	4.96	0	48.5	-0.03	3.43	4.19	0	0	0	69	143	0.97	66	31	3	1	1	1
226	1.38	86	2	20	0	109	41	0	5.31	54	134	0	4.8	0	44.8	-1.56	2.4	3.04	1	1	0	203	121	0.21	21	11	1	1	1	0
227	0.73	85	1	19.22	0	142	76	1	4.88	45	116	0	4.75	0	47.89	0.24	2.4	3.43	0	0	0	132	116	1.27	31	11	4	1	1	1
228	0.95	85	2	20.87	0	152	70	0	4.62	73	113	0	4.81	0	51.84	-0.73	2.3	2.77	1	0	1	101	123	0.48	16	10	1	1	1	0
229	1.15	87	2	24.39	0	125	75	0	5.09	36	203	0	4.74	0	62.69	-0.4	2.08	2.3	0	0	0	163	114	0.67	10	8	2	1	1	0
230	0.93	71	1	22.44	3	168	105	0	4.81	38	94	0	5.48	1	68.19	0.16	3.22	4.08	0	0	0	123	241	1.17	59	25	4	0	0	1
231	0.78	68	2	21.16	0	151	76	0	4.29	68	137	0	4.45	0	64.09	-0.07	2.77	2.64	0	0	0	73	86	0.93	14	16	4	0	0	0
232	0.75	79	2	22.08	0	146	70	1	5.23	43	128	0	4.73	0	44.82	-0.89	2.56	3.26	0	0	0	187	113	0.41	26	13	1	1	1	1
233	0.98	88	2	15.18	0	165	75	0	4.68	55	118	0	5.09	0	54.33	-0.42	2.56	2.83	0	0	0	108	163	0.66	17	13	2	1	1	0
234	1.15	79	1	22.03	0	101	69	0	4.55	56	112	0	5.75	1	47.97	-0.16	2.94	2.94	0	0	0	95	314	0.85	19	19	3	1	1	1
235	1	76	2	26.74	0	131	81	1	4.64	29	95	0	4.6	0	53.54	-0.48	4.09	3.97	1	0	1	104	99	0.62	53	60	2	1	1	1
236	0.8	92	2	22.64	0	144	78	1	4.81	60	171	0	4.53	0	69.75	-0.76	2.71	3.3	1	1	1	123	93	0.47	27	15	1	1	1	1
237	0.75	85	1	13.79	3	133	79	0	4.75	78	163	0	4.58	0	65.6	-0.3	1.39	2.64	0	0	0	116	98	0.74	14	4	3	0	0	0
238	1.08	85	1	15.7	3	132	68	0	4.08	62	95	0	4.74	0	75.36	-0.27	2.4	2.4	0	0	0	59	114	0.76	11	11	3	1	1	0
239	0.93	89	2	21.29	0	126	72	1	4.9	48	135	0	5.33	0	37.09	-0.8	3.22	3.53	0	0	0	134	206	0.45	34	25	1	0	0	1
240	0.9	75	2	32.85	0	160	96	1	4.28	45	98	0	4.62	0	42.45	-0.43	2.48	2.77	0	0	0	72	102	0.65	16	12	2	0	0	1
241	1.2	92	2	19.59	0	141	97	0	3.91	47	67	0	4.79	0	78.43	-0.36	3.14	2.3	0	0	0	50	120	0.7	10	23	3	1	1	0
242	0.95	68	1	19.65	3	152	78	0	4.03	44	65	0	4.82	0	111.15	-0.02	3.04	3.22	0	0	0	56	124	0.98	25	21	3	0	0	0
243	1.15	77	2	22.35	0	163	85	1	4.13	50	91	0	4.65	0	58.15	-0.31	2.71	2.94	0	0	0	62	105	0.73	19	15	3	1	1	1
244	1.3	76	2	22.16	0	130	74	1	4.04	94	173	0	4.71	0	64.11	-0.78	2.4	2.71	0	0	0	57	111	0.46	15	11	1	1	1	1
245	0.75	87	2	21.08	0	112	72	0	4.34	63	163	0	4.6	0	46.34	-0.01	2.94	2.4	0	0	0	77	99	0.99	11	19	4	1	1	0
246	0.9	74	2	18.51	0	143	83	0	3.81	86	114	0	4.74	0	60.63	-0.54	2.56	2.89	0	0	0	45	115	0.58	18	13	2	0	0	0
247	1.05	82	2	15	0	131	73	1	4.32	84	165	0	4.82	0	46.55	-0.62	0.69	2.4	0	0	0	75	124	0.54	11	2	2	1	1	1
248	0.83	83	1	22.1	0	128	66	0	4.57	60	124	0	4.77	0	78.18	-0.62	2.64	2.89	0	0	0	97	118	0.54	18	14	1	0	0	0
249	1.43	87	2	27.54	0	170	67	1	4.09	69	84	0	4.6	0	79.7	-0.13	2.48	2.48	1	1	0	60	99	0.88	12	12	3	1	1	1
250	1.2	78	2	17.85	0	113	61	1	4.36	38	68	0	4.33	0	98.36	0.48	2.3	2.2	1	1	0	78	76	1.62	9	10	4	1	1	1
251	0.85	85	2	16.62	0	153	84	0	4.53	63	174	0	4.67	0	64.18	-0.15	1.79	2.71	0	0	0	93	107	0.86	15	6	3	0	0	0
252	1.1	82	2	22.52	0	177	76	1	4.98	65	136	0	4.54	0	41.85	-0.56	2.48	2.89	1	1	1	146	94	0.57	18	12	2	1	0	1
253	1.03	93	1	14.82	3	119	70	0	3.99	42	62	0	4.68	0	78.04	-0.02	3.18	2.2	0	0	0	54	108	0.98	9	24	3	1	1	0
254	1	79	2	23.8	0	156	72	0	4.22	46	106	0	4.61	0	75.67	-0.26	1.95	2.89	0	0	0	68	100	0.77	18	7	3	1	0	0
255	0.73	87	2	20.65	0	174	68	0	3.97	49	50	0	4.55	0	49.44	0.41	1.95	2.48	0	0	0	53	95	1.51	12	7	4	0	0	0
256	1.3	80	2	20.96	0	153	84	1	5.21	47	220	0	5.2	0	87.01	0.14	2.77	3.14	1	1	0	184	181	1.15	23	16	4	1	1	1
257	0.95	85	2	19.97	0	130	74	0	3.87	82	164	0	4.98	0	37.59	-0.05	3.3	3	0	0	0	48	146	0.95	20	27	4	1	1	0
258	0.88	74	2	25.08	0	111	64	1	4.28	55	97	1	4.36	0	67.92	-0.62	3.37	2.89	1	0	1	72	78	0.54	18	29	2	1	1	1
259	0.7	65	2	22.13	0	126	63	0	4.98	47	106	0	4.79	0	39.77	-0.63	1.79	2.48	0	0	0	145	120	0.53	12	6	2	0	0	0
260	0.9	82	2	24.84	0	141	99	0	4.25	48	117	0	4.73	0	99.37	-0.67	2.3	3.22	1	1	0	70	113	0.51	25	10	1	1	1	0
261	1.15	84	2	12.79	0	123	63	1	3.26	57	63	0	4.63	0	122.91	-0.36	4.23	3.4	0	0	0	26	103	0.7	30	69	3	1	1	1
262	0.88	90	2	17.94	0	160	90	1	4.85	67	147	0	4.84	0	48.96	0.03	3.09	3.09	1	1	0	128	126	1.03	22	22	4	1	1	1
263	0.65	87	2	23.78	0	97	64	1	4.04	40	62	0	5.53	1	42.58	-0.43	2.48	3.18	1	1	0	57	253	0.65	24	12	2	1	1	1
264	0.78	80	2	19.6	0	162	88	0	4.74	74	126	0	4.54	0	43.62	-0.54	2.4	3.04	0	0	0	115	94	0.58	21	11	2	0	0	0
265	1.38	83	1	22.18	0	99	66	0	4.83	29	164	0	5.11	0	67.81	-0.6	2.89	3.3	1	1	0	125	165	0.55	27	18	2	1	1	0
266	1.13	78	2	20.59	0	105	62	1	4.73	44	116	0	4.58	0	69.27	-1.05	2.64	3.71	1	1	0	113	98	0.35	41	14	1	1	1	1
267	0.9	65	1	22.51	3	163	88	0	3.81	91	125	0	4.72	1	60.53	0.22	3	3.76	0	0	0	45	112	1.24	43	20	4	1	1	1
268	1	86	2	23.97	0	130	75	0	4.13	39	99	0	4.85	0	43.74	0.05	3.22	3	0	0	0	62	128	1.05	20	25	4	1	1	0
269	0.93	64	2	24.46	0	124	82	0	3.69	60	118	0	4.73	0	73.32	0.48	2.94	3.22	0	0	0	40	113	1.62	25	19	4	0	0	0
270	0.8	83	2	26.66	0	141	71	1	4.55	44	71	0	4.74	0	50.11	-0.46	2.64	2.64	1	1	0	95	114	0.63	14	14	2	0	0	1
271	1.1	70	2	24.52	0	166	99	0	4.76	74	142	0	4.65	0	81.46	-0.87	2.89	2.94	0	0	0	117	105	0.42	19	18	1	1	1	0
272	1.5	89	1	17.38	3	101	69	1	4.23	41	61	0	4.98	0	91.87	-0.45	3.18	2.3	0	0	0	69	146	0.64	10	24	2	1	1	1
273	1.23	81	2	23.03	0	167	91	1	4.86	39	145	1	4.79	0	56.46	-0.26	2.4	2.89	1	1	0	129	120	0.77	18	11	3	1	1	1
274	1	81	1	19.2	1	125	84	0	4.62	46	178	0	5.04	1	71.13	0.09	2.77	3.56	0	0	0	101	155	1.09	35	16	4	1	1	1
275	0.9	78	1	21.06	0	157	84	1	4.51	17	88	0	4.86	0	51.6	0.22	3.64	3.43	0	0	0	91	129	1.25	31	38	4	0	0	1
276	1.03	77	2	18.03	0	172	98	1	5.19	40	189	0	5.65	1	48.61	-0.78	1.95	3.47	1	1	1	179	285	0.46	32	7	1	1	1	1
277	1.1	87	1	19.23	0	126	86	1	4.69	61	157	0	5.44	1	132.2	-0.19	1.61	2.2	0	0	0	109	230	0.83	9	5	3	1	1	1
278	0.88	84	2	20.16	0	138	83	0	4.79	44	161	0	4.47	0	49.28	-0.29	2.08	2.48	1	1	0	120	87	0.75	12	8	3	0	0	0
279	0.73	69	1	18.83	0	134	89	0	3.61	107	103	0	5.11	0	134.58	-0.58	2.83	3.76	0	0	0	37	165	0.56	43	17	2	0	0	0
280	1.03	81	1	16.79	3	146	75	1	4.2	38	109	0	4.39	0	75.29	-0.78	1.61	3.22	0	0	0	67	81	0.46	25	5	1	1	1	1
281	0.8	77	1	18.91	3	129	77	0	3.58	49	71	0	4.84	0	97.52	-0.19	2.2	2.64	0	0	0	36	127	0.83	14	9	3	0	0	0
282	0.83	79	2	17.36	0	106	70	0	3.85	84	67	0	4.47	0	56.04	-0.73	3.09	2.56	0	0	0	47	87	0.48	13	22	1	1	1	0
283	0.68	67	2	22.86	0	138	74	1	3.71	55	45	0	5.5	1	60.52	0.64	3.89	4.16	0	0	0	41	244	1.9	64	49	4	0	0	1
284	1.03	83	2	19.64	0	131	77	1	5.04	36	70	0	4.51	0	65.72	-0.6	3.18	3.71	0	0	0	154	91	0.55	41	24	2	0	0	1
285	1	89	2	25.92	0	138	79	1	4.11	56	132	0	4.69	0	76.04	-0.17	3.69	3.09	1	1	1	61	109	0.84	22	40	3	1	1	1
286	0.78	86	2	19.9	0	138	78	0	4.33	75	80	0	4.43	0	47.09	-0.03	2.83	2.08	1	1	0	76	84	0.97	8	17	4	1	1	0
287	0.98	84	2	28.44	0	145	97	1	4.01	51	75	0	4.45	0	75.8	0.29	2.48	2.2	0	0	0	55	86	1.33	9	12	4	1	1	1
288	0.85	72	2	23.18	0	161	85	1	3.78	61	156	1	4.76	0	42.01	-0.71	2.89	2.89	1	1	0	44	117	0.49	18	18	1	0	0	1
289	1.03	77	1	20.58	0	184	83	1	3.64	66	123	0	5.11	1	76.39	0.14	2.48	2.3	0	0	0	38	165	1.15	10	12	4	1	0	1
290	1.1	80	2	20.3	0	159	88	1	4.78	61	108	0	4.56	0	63.17	-0.89	2.2	2.64	0	0	0	119	96	0.41	14	9	1	1	0	1
291	1.2	79	1	21.7	0	139	74	1	3.89	58	73	0	4.73	0	100.46	0.01	3.04	2.77	1	1	0	49	113	1.01	16	21	3	1	1	1
292	1.1	87	2	21.34	0	130	82	1	3.22	54	43	0	5.24	1	36.21	-0.62	2.64	2.56	1	0	1	25	189	0.54	13	14	2	1	1	1
293	0.9	82	2	14.73	0	112	72	0	3.69	81	68	0	4.5	0	64.84	0.2	2.71	3.04	0	0	0	40	90	1.22	21	15	4	0	0	0
294	0.8	96	2	21.29	0	106	78	0	4.7	48	143	0	4.23	0	59.95	0.52	2.08	2.71	0	0	0	110	69	1.68	15	8	4	1	1	0
295	1.03	94	2	23.7	0	124	92	0	4.78	21	82	0	4.74	0	33.72	0.16	2.89	4.17	1	1	0	119	114	1.17	65	18	4	1	1	0
296	0.98	73	2	15.58	0	110	83	0	4.29	48	118	0	4.52	1	64.86	-0.43	3.22	3.4	0	0	0	73	92	0.65	30	25	2	0	0	1
297	1.05	82	1	27.62	3	136	87	1	4.29	62	139	0	4.68	0	43.67	0.1	2.71	2.89	0	0	0	73	108	1.1	18	15	4	1	1	1
298	0.88	81	1	26.84	0	146	70	1	3.81	81	55	0	4.62	1	69.21	-0.78	3.26	3.3	1	1	0	45	102	0.46	27	26	1	1	1	1
299	0.9	87	2	25	0	130	79	1	4.75	38	96	0	4.26	0	33.51	-0.48	1.79	1.95	1	0	1	116	71	0.62	7	6	2	1	1	1
300	1.2	80	1	18.82	3	166	76	1	4.53	49	152	0	4.91	0	46.89	-0.22	2.71	3.53	1	1	0	93	135	0.8	34	15	3	1	1	1
301	1.05	88	1	20.49	3	121	75	0	3.95	77	82	0	4.44	0	60.23	-0.31	1.95	2.48	0	0	0	52	85	0.73	12	7	2	1	1	0
302	0.88	78	1	18.35	3	97	59	0	4.44	42	104	0	4.93	0	67.24	-0.8	2.56	3.5	1	1	1	85	139	0.45	33	13	1	1	1	0
303	1.03	85	1	21.21	0	127	58	0	4.13	26	81	0	4.62	0	56.68	-0.76	2.2	2.56	0	0	0	62	102	0.47	13	9	1	1	1	0
304	1.42	86	2	16.94	3	151	94	1	4.76	44	114	0	4.92	0	31.83	-1.11	1.61	2.64	0	0	0	117	137	0.33	14	5	1	1	1	1
305	1.13	79	2	19.9	0	152	77	0	4.08	85	135	0	4.96	0	70.25	0.49	3	2.94	1	1	0	59	142	1.63	19	20	4	1	1	0
306	0.88	84	2	21.52	0	157	57	1	4.08	74	154	1	4.6	1	55.88	-0.2	2.4	3.09	1	0	1	59	99	0.82	22	11	3	1	1	1
307	1.33	72	1	19.54	0	131	88	1	4.16	57	145	0	4.28	1	44.15	-0.36	2.08	3.85	1	0	1	64	72	0.7	47	8	2	1	1	1
308	0.75	82	1	20.73	3	117	60	1	4.7	43	78	0	4.74	0	68.97	-0.89	2.71	3	0	0	0	110	114	0.41	20	15	1	0	0	1
309	0.7	80	2	22.84	0	121	69	1	4.3	64	141	0	4.75	1	76.87	-0.37	2.4	2.56	0	0	0	74	116	0.69	13	11	3	1	1	1
310	1.05	88	2	21.07	0	161	82	1	4.88	63	175	0	4.6	0	34.04	-0.4	1.61	2.2	1	1	0	132	99	0.67	9	5	2	1	1	1
311	0.7	73	2	21.03	0	216	131	0	4.01	79	155	0	4.5	0	80.49	-0.04	2.71	2.4	0	0	0	55	90	0.96	11	15	4	0	0	0
312	1.05	73	2	22.13	0	139	85	1	3.61	63	159	0	4.6	0	100.24	-0.22	2.71	2.4	1	1	0	37	99	0.8	11	15	3	1	1	1
313	1.3	78	2	17.6	0	195	106	1	4.79	63	236	0	5.54	1	53.14	-0.94	2.89	3.04	0	0	0	120	255	0.39	21	18	1	1	1	1
314	0.95	77	1	22.45	0	164	84	1	4.51	58	102	0	4.88	0	90.87	0.08	2.3	2.94	0	0	0	91	131	1.08	19	10	4	1	1	1
315	0.93	83	1	17.48	1	114	74	0	4.45	42	112	0	5.19	0	97.21	0.09	4.14	4.03	1	1	0	86	179	1.09	56	63	4	1	1	0
316	1.58	76	1	23.83	0	180	88	1	3.83	44	107	0	4.56	0	68.63	-0.82	2.77	2.83	1	1	0	46	96	0.44	17	16	1	1	1	1
317	1	87	2	15.65	0	102	54	0	4.14	25	82	0	4.8	0	65.97	-0.67	1.61	1.95	1	1	0	63	122	0.51	7	5	1	1	1	0
318	1.5	81	2	21.33	0	177	89	1	4.53	46	154	0	4.68	0	47.3	-0.31	2.71	2.4	0	0	0	93	108	0.73	11	15	3	1	1	1
319	1.7	63	2	16.25	2	132	54	1	4.49	59	140	0	5.56	0	112.77	0.03	2.71	2.77	0	0	0	89	260	1.03	16	15	4	1	1	1
320	0.88	75	2	20.41	0	143	57	1	4.89	87	128	0	4.53	1	46.6	0.18	2.94	3.47	1	1	0	133	93	1.2	32	19	4	1	1	1
321	0.85	91	2	16.3	0	138	59	1	4.03	47	100	0	4.43	0	53.81	-0.45	2.2	2.3	0	0	0	56	84	0.64	10	9	2	1	1	1
322	0.95	90	2	16.92	0	125	92	1	4.41	56	125	1	4.45	0	51.72	-0.29	2.71	2.56	1	0	1	82	86	0.75	13	15	3	1	1	1
323	1.08	84	1	16.8	3	136	66	1	3.53	40	69	0	4.91	1	116.11	-0.45	3.22	3.83	1	1	0	34	136	0.64	46	25	2	1	1	1
324	0.73	74	2	22.07	0	169	85	1	4.56	63	128	0	4.49	0	41.68	-0.82	3.53	2.94	1	1	1	96	89	0.44	19	34	1	0	0	1
325	1.08	69	1	19.72	0	146	73	1	3.74	154	69	0	4.69	0	63.05	0.44	2.77	3.85	1	1	0	42	109	1.56	47	16	4	1	0	1
326	0.83	70	1	12.48	3	101	46	0	4.52	36	112	0	4.54	0	57.31	-0.22	2.83	3.3	0	0	0	92	94	0.8	27	17	3	1	1	0
327	0.93	90	2	22.05	0	133	90	0	3.64	60	62	0	4.5	0	58.22	-0.63	2.08	2.3	0	0	0	38	90	0.53	10	8	2	1	1	0
328	1.58	81	1	23.43	3	135	63	1	4.14	40	74	0	4.36	0	88.05	-0.2	2.71	3	1	1	1	63	78	0.82	20	15	3	1	1	1
329	1.48	89	1	22.22	0	183	90	1	4.01	42	128	0	4.9	1	68.29	-1.02	3.66	2.89	1	1	0	55	134	0.36	18	39	1	1	1	1
330	1.15	69	1	22.7	0	144	79	0	5	68	158	0	5.59	1	54	0.34	3.47	4.29	0	0	0	148	268	1.41	73	32	4	1	0	1
331	0.68	67	2	23.81	0	158	95	1	4.63	62	82	1	4.62	0	73.66	-0.07	2.83	2.77	0	0	0	103	101	0.93	16	17	4	0	0	1
332	0.85	83	1	18.03	0	107	70	1	4.08	71	80	0	5.09	0	84.59	-0.65	2.4	3.66	1	1	0	59	163	0.52	39	11	1	1	1	1
333	1.15	93	2	14.11	0	91	48	0	4.74	39	47	0	4.6	1	47.24	-1.05	2.56	2.2	1	1	0	115	99	0.35	9	13	1	1	1	1
334	0.95	81	2	21.01	0	197	75	1	4.72	61	146	0	5.3	1	78.12	-0.84	2.48	3.09	0	0	0	112	200	0.43	22	12	1	1	1	1
335	1.1	87	1	19.82	3	139	73	1	4.56	65	149	0	4.48	0	62.71	-0.6	2.83	3.61	1	0	1	96	88	0.55	37	17	2	1	1	1
336	0.83	92	2	14.77	0	150	68	1	4.17	79	128	0	4.71	0	30.68	0.14	1.95	2.48	0	0	0	65	111	1.15	12	7	4	0	0	1
337	0.78	68	2	17.31	0	101	67	1	4.33	58	102	0	4.8	0	85.54	-0.46	3.04	3.78	0	0	0	76	121	0.63	44	21	2	0	0	1
338	1.73	84	1	15.82	3	143	75	0	4.01	66	94	0	4.87	0	42.61	-0.89	2.2	2.4	0	0	0	55	130	0.41	11	9	1	1	1	0
339	1.03	86	2	23.74	0	169	83	1	3.83	60	77	0	5.23	1	76.79	0.49	1.95	2.71	0	0	0	46	187	1.64	15	7	4	1	1	1
340	1.1	88	2	22.18	0	133	71	1	4.14	51	95	0	4.63	0	36.46	0.44	2.56	2.3	0	0	0	63	103	1.55	10	13	4	1	1	1
341	0.9	77	2	16.35	0	121	76	0	4.47	40	102	0	5.18	1	37.13	-0.62	2.83	4.06	0	0	0	87	177	0.54	58	17	2	0	0	1
342	0.73	73	2	20.7	0	158	95	1	4.13	58	174	0	4.28	0	64.86	-0.15	3	2.56	0	0	0	62	72	0.86	13	20	3	0	0	1
343	1.1	85	2	20.26	0	137	80	0	3.97	74	137	0	4.56	0	36.82	-0.82	2.89	2.83	0	0	0	53	96	0.44	17	18	1	1	1	0
344	1.18	83	1	20.49	3	119	57	1	4.94	56	65	1	4.83	0	40.28	-0.84	2.94	2.4	1	0	1	140	125	0.43	11	19	1	1	1	1
345	0.93	71	1	24.17	2	195	108	0	4.33	72	81	0	4.7	0	71.88	-0.25	3.26	3.71	0	0	0	76	110	0.78	41	26	3	1	1	0
346	1.2	88	1	19.4	0	135	100	0	4.49	44	148	0	5.14	0	47.88	-0.09	1.95	2.4	0	0	0	89	170	0.91	11	7	3	1	1	0
347	0.83	88	2	21.4	0	124	75	1	4.53	51	112	0	4.53	0	57.69	0.01	2.4	2.77	0	0	0	93	93	1.01	16	11	4	0	0	1
348	1.08	71	2	23.56	0	114	75	1	4.38	52	154	0	4.89	0	36.2	-0.14	3.66	3.18	0	0	0	80	133	0.87	24	39	3	1	0	1
349	0.68	72	2	24.39	0	150	80	1	4.82	38	125	0	4.5	0	65.11	-0.4	2.56	2.71	0	0	0	124	90	0.67	15	13	2	0	0	1
350	0.85	70	2	25.68	0	143	79	0	4.43	68	161	0	4.75	0	67.85	-0.54	3.56	3.97	0	0	0	84	116	0.58	53	35	2	1	1	0
351	0.8	75	1	26.67	0	138	80	0	4.49	41	149	0	4.52	0	38.29	-0.4	3.14	3.58	0	0	0	89	92	0.67	36	23	2	0	0	0
352	0.98	82	2	21.38	0	161	63	0	3.83	83	131	0	5.03	0	59.79	-0.02	2.3	2.48	0	0	0	46	153	0.98	12	10	4	0	0	0
353	0.95	84	1	21.86	2	127	76	1	4.39	26	69	0	4.9	1	53.23	-0.37	4.36	4.06	1	1	0	81	134	0.69	58	78	2	1	1	1
354	0.98	83	1	17.9	0	125	77	0	3.99	43	94	0	4.51	0	137.41	-0.25	2.89	3.4	1	1	0	54	91	0.78	30	18	3	1	1	0
355	0.93	73	1	18.83	0	97	58	0	4.6	75	84	0	4.73	1	54.25	-0.67	3.33	4.3	0	0	0	99	113	0.51	74	28	1	0	0	1
356	1.08	72	1	27.94	0	173	80	0	5.48	61	114	0	4.79	0	58.78	-0.73	2.94	3.78	1	1	0	239	120	0.48	44	19	1	1	1	0
357	1.23	74	2	21.78	0	143	83	1	4.26	62	84	1	4.92	0	93.05	-0.27	3.37	2.83	1	1	0	71	137	0.76	17	29	3	1	1	1
358	0.98	84	1	23.09	3	154	89	0	4.47	43	146	1	4.47	0	62.56	-0.97	2.3	3.3	1	0	1	87	87	0.38	27	10	1	1	1	1
359	0.95	73	2	22.01	0	122	77	0	4.38	35	85	0	4.47	0	70.6	-0.48	1.95	2.08	1	1	0	80	87	0.62	8	7	2	0	0	0
360	0.98	75	1	18.83	0	165	95	0	4.04	40	112	0	4.57	0	101.97	0.03	2.71	2.3	1	1	0	57	97	1.03	10	15	4	1	1	0
361	1.15	67	1	22.63	3	161	84	0	5.06	44	88	1	4.68	0	77.25	-0.69	2.77	2.94	0	0	0	158	108	0.5	19	16	1	1	1	1
362	0.7	81	1	22.23	0	102	61	1	4.13	36	114	0	5.04	0	73.16	-0.82	3.37	3.47	0	0	0	62	154	0.44	32	29	1	1	1	1
363	1.15	90	2	20.44	0	137	62	1	4.28	57	107	0	4.52	0	38.15	-0.33	2.2	2.48	0	0	0	72	92	0.72	12	9	3	1	1	1
364	0.75	85	2	27.44	0	189	96	1	3.81	73	67	0	5.54	1	42.37	-0.17	2.2	2.64	1	1	0	45	255	0.84	14	9	3	1	1	1
365	1.45	88	2	17.91	0	158	78	0	4.43	76	158	0	5.46	0	84.67	-0.36	2.48	3	1	1	0	84	234	0.7	20	12	3	1	1	0
366	1.45	84	1	16.3	3	147	85	1	4.23	59	110	0	4.82	0	53.23	-0.71	2.64	3.22	1	0	0	69	124	0.49	25	14	1	1	1	1
367	1.28	85	1	21.83	0	102	71	1	4.3	37	89	0	4.71	0	110.85	-0.17	2.3	2.56	0	0	0	74	111	0.84	13	10	3	1	1	1
368	1.1	91	1	22.68	3	126	60	0	4.09	52	96	1	4.86	1	92.95	-0.06	2.77	2.48	1	1	0	60	129	0.94	12	16	3	1	1	1
369	1.1	78	1	21.22	3	148	78	0	4.08	40	123	0	5.2	0	75.02	-1.27	3.09	3.58	0	0	0	59	182	0.28	36	22	1	1	1	0
370	0.9	79	2	17.6	0	169	98	1	4.09	69	132	0	5.36	0	93.44	-0.15	4.13	3.71	1	1	0	60	213	0.86	41	62	3	0	0	1
371	0.93	77	2	18.72	0	123	90	1	4.19	62	132	0	4.79	0	59.03	0.04	4.11	2.71	0	0	0	66	120	1.04	15	61	4	0	0	1
372	0.98	67	1	22.17	1	148	78	0	5.51	37	108	0	4.48	0	67.59	-0.45	2.77	3.04	0	0	0	247	88	0.64	21	16	2	0	0	0
373	1.05	83	2	19.49	0	163	80	1	4.17	71	93	0	4.88	0	37.46	-1.05	3.14	3.58	1	1	0	65	132	0.35	36	23	1	1	1	1
374	1.18	87	1	20.78	0	129	97	1	4.2	65	69	0	4.19	0	61.17	-0.14	3.18	2.71	1	1	0	67	66	0.87	15	24	3	1	1	1
375	0.8	79	2	24.35	0	91	40	1	4.49	53	74	0	5.06	0	43.27	-0.56	2.71	2.94	1	0	1	89	158	0.57	19	15	2	1	1	1
376	0.9	73	2	23.68	0	135	75	0	4.38	61	63	1	4.47	0	62.8	-0.4	2.08	2.89	1	1	0	80	87	0.67	18	8	2	0	0	1
377	1.05	62	2	20.45	0	124	64	0	4.29	76	73	0	4.96	0	42.01	-0.3	3	2.83	0	0	0	73	142	0.74	17	20	3	1	0	0
378	0.9	80	1	22.49	0	124	88	0	4.09	45	93	0	4.9	0	46.45	-0.02	2.08	3.14	1	1	1	60	134	0.98	23	8	3	0	0	0
379	1	92	2	19.34	0	147	86	1	4.2	44	127	0	4.52	0	39.16	-0.43	2.08	2.83	0	0	0	67	92	0.65	17	8	2	1	1	1
380	0.88	81	2	19.75	0	161	107	0	4.34	58	110	0	4.83	0	78.12	-0.71	3.14	2.48	1	1	0	77	125	0.49	12	23	1	1	1	0
381	1.23	88	1	18.87	3	140	70	0	4.39	44	60	0	4.43	0	46.95	0.36	2.4	2.77	1	0	1	81	84	1.43	16	11	4	1	1	0
382	1.17	82	1	18.71	3	142	72	1	4.33	33	128	0	4.69	0	57.27	-0.89	2.71	3.58	0	0	0	76	109	0.41	36	15	1	1	1	1
383	0.98	92	2	24.84	0	163	72	0	3.56	54	186	0	5.01	0	55.25	-0.3	2.56	2.56	0	0	0	35	150	0.74	13	13	3	0	0	0
384	1	79	1	20.99	0	85	65	0	3.61	52	55	0	4.69	0	42.26	0.09	3.66	2.94	1	1	0	37	109	1.09	19	39	4	1	1	0
385	0.73	80	2	24.19	0	145	80	0	5.55	43	86	0	4.51	0	71.28	-0.8	2.83	2.48	0	0	0	258	91	0.45	12	17	1	1	1	0
386	1.1	69	2	33.33	0	160	74	1	4.87	48	200	0	5.31	0	53.56	-0.17	2.77	2.83	1	1	0	130	202	0.84	17	16	3	1	1	1
387	0.98	77	2	23.02	0	168	62	1	4.37	61	97	0	4.63	0	58.15	-0.82	3.14	2.3	0	0	0	79	103	0.44	10	23	1	1	1	1
388	0.93	71	1	22.19	0	183	99	0	4.09	68	71	0	4.36	0	53.56	-0.37	3.14	2.71	0	0	0	60	78	0.69	15	23	2	0	0	0
389	0.83	77	2	20.03	0	136	87	0	4.45	38	84	0	4.64	0	42.13	-0.8	1.79	2.48	0	0	0	86	104	0.45	12	6	1	0	0	0
390	1.23	86	2	31.8	0	146	74	0	4.08	58	128	0	4.78	0	53.91	0.41	2.71	3	1	1	0	59	119	1.5	20	15	4	1	1	0
391	0.83	76	2	24.52	0	131	91	0	4.64	45	113	0	4.58	0	53.54	-0.76	2.56	1.79	0	0	0	104	98	0.47	6	13	1	1	1	0
392	1.23	93	2	22.94	0	180	77	1	4.03	63	115	0	4.9	0	46.04	-0.42	2.89	2.83	0	0	0	56	134	0.66	17	18	2	1	0	1
393	1	78	2	18.89	0	193	106	0	5.13	44	106	0	4.5	0	34.91	-1.14	2.89	3.18	0	0	0	169	90	0.32	24	18	1	1	1	0
394	1.15	76	1	18.51	0	115	64	0	4.41	66	139	0	5.13	0	75.58	0.1	2.56	2.64	0	0	0	82	169	1.1	14	13	4	1	1	0
395	0.9	83	1	24.44	0	179	91	1	3.93	51	112	0	4.91	0	73.69	-0.02	2.77	2.83	1	1	0	51	135	0.98	17	16	3	1	1	1
396	0.9	78	1	25.98	0	139	101	1	4.14	63	110	0	4.93	0	69.97	0.12	2.77	3.97	1	1	0	63	139	1.13	53	16	4	1	1	1
397	1.18	77	1	21.91	3	182	98	0	4.91	55	111	0	4.67	0	60.38	-0.46	2.83	2.64	0	0	0	136	107	0.63	14	17	2	1	1	0
398	0.85	84	1	18.88	0	90	49	0	4.01	42	76	0	4.95	1	81.63	0.14	3.78	2.56	1	1	0	55	141	1.15	13	44	4	0	0	1
399	0.93	87	2	21.57	0	158	84	0	4.2	54	128	0	5.63	1	69.58	-0.63	3.85	3.33	1	1	0	67	279	0.53	28	47	2	1	1	1
400	0.93	67	1	23.76	0	175	110	0	3.85	39	170	0	5.13	0	78.36	-0.34	3.74	3.53	0	0	0	47	169	0.71	34	42	2	0	0	0
401	1	91	1	20.11	2	144	90	0	4.29	32	113	0	4.84	0	49.87	0.42	3.43	2.48	0	0	0	73	127	1.52	12	31	4	1	0	0
402	0.98	85	1	21.8	0	124	92	1	4.09	52	87	0	4.77	1	98.37	-0.42	2.56	2.94	1	1	0	60	118	0.66	19	13	2	1	1	1
403	0.88	76	1	18.93	0	106	58	0	4.8	48	85	0	4.62	0	40.31	-0.37	2.89	3.18	0	0	0	122	102	0.69	24	18	2	1	1	0
404	0.8	69	1	19.46	3	149	87	0	3.87	65	111	0	4.47	0	72.47	-1.17	2.89	4.09	1	1	1	48	87	0.31	60	18	1	0	0	0
405	1.13	92	2	17.91	0	121	86	0	4.13	51	114	0	4.8	0	83.59	-0.36	3.04	2.64	1	1	0	62	122	0.7	14	21	3	1	1	0
406	0.95	88	1	25.3	0	189	77	1	5.1	73	134	0	5.2	0	56.12	-0.73	2.89	3.47	1	1	1	164	182	0.48	32	18	1	1	1	1
407	1.3	63	1	22.14	3	121	76	0	4.95	54	159	0	4.74	0	73.4	-0.69	3.14	4.01	0	0	0	141	114	0.5	55	23	1	1	1	0
408	1.05	83	2	23.44	0	140	70	1	5.03	57	84	0	4.73	0	52.2	-0.87	2.4	3	0	0	0	153	113	0.42	20	11	1	1	1	1
409	0.88	91	1	19.42	0	91	51	0	4.04	61	89	0	5.3	1	55.58	0.14	2.48	2.83	0	0	0	57	200	1.15	17	12	4	0	0	1
410	0.95	85	1	25.23	0	209	87	0	3.83	40	80	0	4.68	0	62.34	0.48	3.78	3.61	0	0	0	46	108	1.62	37	44	4	1	1	0
411	0.98	84	1	22.89	0	218	117	0	4.29	60	123	0	4.78	0	82.94	0.04	2.94	2.89	1	1	0	73	119	1.04	18	19	4	1	1	0
412	1.3	96	1	18.66	0	161	87	0	4.86	46	138	0	4.47	0	41.37	-0.8	2.83	2.77	1	1	0	129	87	0.45	16	17	1	1	1	0
413	1.15	61	1	29.39	3	120	69	1	5.5	32	69	0	4.96	1	60.28	-0.89	3	2.94	0	0	0	245	142	0.41	19	20	1	1	1	1
414	1.03	95	1	28.67	0	111	48	0	4.34	57	55	0	4.51	0	32.51	-0.76	2.4	2.48	1	1	0	77	91	0.47	12	11	1	1	1	0
415	1.03	89	1	26.85	0	97	75	0	3.93	30	79	0	4.76	0	57.24	-0.31	2.64	3.76	0	0	0	51	117	0.73	43	14	2	1	1	0
416	0.65	77	2	24.39	0	139	72	1	4.78	29	81	0	5.06	0	37.88	-0.46	2.71	3.58	0	0	0	119	157	0.63	36	15	2	0	0	1
417	0.88	65	1	24.57	3	128	68	1	4.25	34	96	0	4.7	0	61.92	-0.11	3.22	3.37	0	0	0	70	110	0.9	29	25	3	0	0	1
418	0.78	75	1	21.37	3	116	65	0	3.99	32	90	0	5.27	1	108.07	0.06	3.09	3.4	1	1	0	54	194	1.06	30	22	4	1	1	1
419	0.78	81	2	22.22	0	127	83	0	4.36	66	80	0	4.6	0	90.66	-0.34	2.94	3.61	0	0	0	78	99	0.71	37	19	3	0	0	0
420	1.05	81	2	28.47	0	155	84	0	4.53	69	164	0	5.31	1	65.07	-0.4	2.3	2.64	1	1	0	93	203	0.67	14	10	2	0	0	1
421	1.3	80	1	20.94	0	120	60	0	4.16	52	72	0	4.85	1	48.73	-0.84	2.2	2.4	0	0	0	64	128	0.43	11	9	1	1	1	1
422	1	85	2	15.22	0	148	56	1	3.76	59	54	0	5.14	1	85.51	-0.73	3.33	3.14	1	1	0	43	170	0.48	23	28	1	1	1	1
423	0.8	95	2	19.23	0	104	62	0	4.04	59	96	0	4.62	0	63.22	-0.78	2.3	2.56	0	0	0	57	101	0.46	13	10	1	1	1	0
424	1	70	1	17.21	0	141	91	0	3.71	52	52	0	4.95	0	75.22	-0.8	3.26	2.3	0	0	0	41	141	0.45	10	26	1	1	0	0
425	1	77	2	18.65	0	131	75	1	4.33	53	154	0	4.96	0	73.4	-0.21	1.95	2.89	0	0	0	76	142	0.81	18	7	3	0	0	1
426	1.15	87	1	16.18	0	118	72	1	4.04	83	71	0	5.02	0	77.13	-0.05	3	3.61	1	1	0	57	152	0.95	37	20	3	1	1	1
427	0.77	71	2	24.11	0	122	63	0	4.7	74	147	1	4.77	0	66.46	-0.82	2.3	2.94	1	0	1	110	118	0.44	19	10	1	0	0	1
428	1.04	79	1	20.05	0	139	80	0	3.97	47	81	0	4.63	0	55.36	-0.99	3.47	3.04	1	1	0	53	103	0.37	21	32	1	1	1	0
429	1.05	93	1	18.93	3	113	65	1	4.17	45	113	0	4.71	0	83.23	0.49	3.37	3.18	1	1	0	65	111	1.63	24	29	4	1	1	1
430	1	75	1	20.18	0	151	71	0	4.41	63	108	0	5.17	0	74.79	-0.05	2.64	3	0	0	0	82	176	0.95	20	14	3	1	1	0
431	1.05	82	2	22.18	0	229	88	0	4.41	46	101	0	4.84	1	40.04	-0.19	2.71	3.14	1	0	1	82	127	0.83	23	15	3	1	1	1
432	1	91	1	20.94	0	145	57	1	4.74	28	99	0	5.75	1	61.14	-0.42	3.95	3.09	1	1	0	114	315	0.66	22	52	2	1	1	1
433	1.25	65	2	22.35	0	153	78	1	4.67	57	155	1	5.21	0	77.06	-0.49	2.3	3.22	1	0	1	107	184	0.61	25	10	2	1	1	1
434	0.78	61	2	20.83	0	163	106	1	5.51	53	156	0	4.8	0	48.27	-0.37	2.83	4.19	0	0	0	247	121	0.69	66	17	3	1	1	1
435	0.85	85	1	20.71	0	144	71	0	3.71	46	84	0	4.81	0	70.15	-0.56	2.56	2.08	0	0	0	41	123	0.57	8	13	2	0	0	0
436	1	85	1	18.83	0	104	59	0	4.03	43	52	0	4.28	0	129.85	-0.26	2.3	2.08	1	1	0	56	72	0.77	8	10	3	1	1	0
437	1.15	87	1	21.67	3	116	75	1	4.48	37	80	0	4.77	0	49.5	-0.53	2.89	3.58	0	0	0	88	118	0.59	36	18	2	1	1	1
438	1.03	82	1	16.81	1	90	64	0	3.85	46	58	0	4.62	0	162.53	-0.01	2.3	3.09	1	1	0	47	101	0.99	22	10	3	1	1	0
439	0.88	87	2	26.39	0	134	81	1	5.19	54	180	0	4.93	0	32.9	0.1	2.48	3.22	0	0	0	180	138	1.1	25	12	4	1	1	1
440	1.2	83	2	21.94	0	125	60	1	4.36	115	103	0	5.13	1	45.82	0.24	3.14	3.14	0	0	0	78	169	1.27	23	23	4	1	0	1
441	1	79	2	18.12	0	156	72	0	4.37	64	145	0	4.69	0	74.24	-0.12	2.94	2.77	1	1	0	79	109	0.89	16	19	4	1	1	0
442	0.75	69	2	18.94	0	128	59	0	4.13	38	82	0	4.85	0	74.37	0.41	2.2	2.48	0	0	0	62	128	1.51	12	9	4	0	0	0
443	0.85	85	2	14.18	0	167	90	1	3.97	39	83	0	4.83	0	130.4	-0.65	2.83	2.64	1	1	0	53	125	0.52	14	17	2	0	0	1
444	0.85	87	2	24.9	0	153	84	1	4.65	87	121	1	4.82	0	32.3	-0.08	3	3.18	0	0	0	105	124	0.92	24	20	4	1	1	1
445	1.03	96	2	23.44	0	133	83	0	4.62	67	117	0	4.8	0	54.58	-0.84	2.94	2.48	1	1	1	101	122	0.43	12	19	1	1	1	0
446	1.03	77	1	21.78	3	123	80	0	4.67	83	43	0	4.8	0	69.29	0.1	2.56	3.85	0	0	0	107	121	1.11	47	13	4	0	0	0
447	0.63	79	1	17.75	0	92	62	0	3.99	56	88	0	5.17	0	83.08	-0.58	2.64	3.04	0	0	0	54	176	0.56	21	14	2	0	0	0
448	0.93	88	2	19.98	0	152	76	0	4.93	47	121	0	4.62	0	57.69	-0.8	2.77	2.2	0	0	0	138	101	0.45	9	16	1	0	0	0
449	0.9	71	1	25	3	128	76	0	4.33	59	100	0	4.49	0	88.46	-0.29	2.94	3.76	1	1	0	76	89	0.75	43	19	3	1	1	0
450	1.03	90	2	22.22	0	116	67	0	4.39	50	154	0	4.8	0	36.6	-0.92	2.71	2.77	1	1	0	81	122	0.4	16	15	1	1	1	0
451	0.83	69	2	26.52	0	133	71	0	4.23	47	106	0	4.64	0	74.37	0.13	2.83	3.47	1	1	0	69	104	1.14	32	17	4	1	1	0
452	1.05	75	2	23.49	0	156	74	0	4.38	41	126	0	4.51	0	66.52	-0.34	2.4	2.4	0	0	0	80	91	0.71	11	11	3	1	1	0
453	0.77	73	2	23.99	0	130	68	1	4.01	62	119	0	4.58	0	55.7	-0.42	3.14	2.48	0	0	0	55	98	0.66	12	23	2	1	1	1
454	1.15	76	1	22.57	0	160	84	0	4.37	53	107	0	4.8	0	89.68	-0.53	2.4	2.71	1	1	0	79	122	0.59	15	11	2	1	1	0
455	1.15	87	1	18.8	0	150	54	0	5.44	55	154	0	5.14	0	41.46	-0.36	2.3	2.2	0	0	0	230	171	0.7	9	10	2	1	1	0
456	1.03	67	2	21.52	0	154	73	0	4.26	66	105	0	4.62	0	160.1	-0.82	2.3	2.83	0	0	0	71	102	0.44	17	10	1	1	1	0
457	0.77	83	1	19.59	3	180	87	1	5.03	46	175	0	5.41	0	68.73	0.31	3.04	3.69	0	0	0	153	223	1.37	40	21	4	0	0	1
458	0.88	80	2	19.34	0	159	71	1	4.5	50	155	0	4.66	1	66.42	-0.71	3.14	2.48	1	1	0	90	106	0.49	12	23	1	1	1	1
459	1.08	79	2	24.86	0	156	82	1	4.92	77	127	0	4.64	0	64.45	-0.84	2.94	2.77	1	1	0	137	104	0.43	16	19	1	1	1	1
460	1.08	75	2	18.06	0	126	69	1	4.44	45	130	0	4.38	0	73.96	-0.43	1.79	2.4	1	1	0	85	80	0.65	11	6	2	1	1	1
461	1.08	81	2	24.73	0	206	88	1	3.71	55	119	0	4.43	0	67.33	-0.33	2.2	2.2	1	1	0	41	84	0.72	9	9	3	1	0	1
462	1.08	81	2	20.44	0	187	81	0	4.64	70	90	0	4.61	0	62.95	-0.12	2.4	2.64	0	0	0	104	100	0.89	14	11	4	1	0	0
463	0.95	64	2	27.19	0	119	88	1	4.28	54	97	0	4.7	0	55.47	0.3	3	3.14	1	1	0	72	110	1.35	23	20	4	0	0	1
464	0.98	91	2	14.71	0	119	57	0	4.5	45	86	0	5.47	0	58.03	-0.73	3.78	2.89	0	0	0	90	237	0.48	18	44	1	1	1	0
465	1.18	78	1	18.08	3	99	74	0	4.03	62	102	0	4.56	0	61.6	-0.37	2.48	3.04	0	0	0	56	96	0.69	21	12	2	1	1	0
466	1.1	86	1	22.6	2	134	64	0	4.47	31	63	0	4.5	0	44.66	-0.76	2.4	3.09	0	0	0	87	90	0.47	22	11	1	1	0	0
467	0.73	77	2	18.26	0	132	85	0	4.11	69	98	0	5.11	0	49.87	-0.06	2.94	3.09	0	0	0	61	165	0.94	22	19	4	0	0	0
468	1.15	92	1	23.75	3	93	54	0	5.02	19	88	1	5.68	1	87.84	-0.34	3.5	2.77	1	0	1	151	293	0.71	16	33	2	1	1	1
469	1.13	78	1	13.55	3	172	101	1	4.16	99	104	0	4.47	0	111.28	-0.14	3.3	3.47	0	0	0	64	87	0.87	32	27	3	1	1	1
470	1.38	86	2	24.71	0	141	59	1	4.88	32	52	0	5.42	1	60.88	-0.51	2.94	2.2	0	0	0	132	227	0.6	9	19	2	1	0	1
471	1.18	86	2	25.36	0	157	70	1	5.33	54	73	0	4.45	1	30.22	-0.94	2.2	2.56	0	0	0	206	86	0.39	13	9	1	1	1	1
472	0.65	69	2	23.81	0	135	80	0	4.28	50	118	0	4.82	0	97.15	-0.05	2.56	2.4	0	0	0	72	124	0.95	11	13	4	0	0	0
473	1	86	2	19.87	0	170	57	1	4.13	66	143	0	4.95	1	76.79	0.12	1.95	2.77	0	0	0	62	141	1.13	16	7	4	1	1	1
474	0.88	91	2	18.25	0	166	90	0	4.26	48	98	0	4.86	0	65.12	-0.22	1.79	2.64	1	1	0	71	129	0.8	14	6	3	1	1	0
475	1.23	92	2	17.6	0	168	106	1	4.74	66	147	0	5.06	0	48.65	-0.51	2.56	3.26	1	1	0	115	157	0.6	26	13	2	1	0	1
476	1.2	83	2	22.22	0	137	67	1	4.66	50	136	0	5.1	0	58.67	-0.87	1.95	2.48	0	0	0	106	164	0.42	12	7	1	1	1	1
477	1.9	80	1	21.51	3	164	86	1	4.2	40	89	0	4.44	0	35.92	-0.63	2.08	2.71	1	1	0	67	85	0.53	15	8	1	1	1	1
478	1.28	86	2	18.97	0	122	67	0	4.76	42	132	0	4.83	0	51.67	-0.71	2.77	3.09	0	0	0	117	125	0.49	22	16	1	1	1	0
479	0.88	79	2	15.22	0	131	74	1	4.42	76	120	0	4.48	0	47.64	-0.02	2.83	2.3	1	1	0	83	88	0.98	10	17	4	1	1	1
480	0.98	83	2	19.9	0	142	58	1	4.29	51	97	0	4.62	0	46.39	-0.16	2.3	2.77	0	0	0	73	101	0.85	16	10	3	1	1	1
481	0.8	76	1	30.7	3	183	103	0	4.63	56	232	0	4.69	0	52.52	-0.6	3.18	3.37	0	0	0	103	109	0.55	29	24	2	1	1	0
482	0.98	82	1	21.16	3	150	57	1	5.58	30	96	0	4.45	1	31.05	-0.58	2.89	2.94	1	1	0	266	86	0.56	19	18	2	1	1	1
483	0.9	75	2	23.56	0	149	79	1	4.06	61	132	0	4.77	1	53.74	0.12	3.43	3.26	0	0	0	58	118	1.13	26	31	4	0	0	1
484	0.83	82	2	19.84	0	172	67	1	4.5	32	127	0	5.49	1	37.97	-0.33	3.09	2.56	0	0	0	90	242	0.72	13	22	3	0	0	1
485	1.8	90	2	23.88	0	141	55	1	3.64	68	88	0	4.45	0	34.14	-0.94	2.56	2.08	0	0	0	38	86	0.39	8	13	1	1	1	1
486	0.9	75	2	22.23	0	181	97	1	4.13	76	144	1	4.8	0	57.73	-0.43	2.64	2.48	0	0	0	62	121	0.65	12	14	2	0	0	1
487	0.76	82	2	27.77	0	170	80	0	4.42	54	112	0	4.54	0	43.31	-0.49	2.48	2.48	1	1	0	83	94	0.61	12	12	2	0	0	0
488	1.19	72	2	25.42	0	119	72	0	4.56	25	117	0	4.69	1	74.83	0.37	1.95	2.89	1	0	1	96	109	1.45	18	7	4	1	1	1
489	0.98	83	1	22.28	3	111	67	1	4.41	34	66	0	4.8	0	33.55	-0.49	3.53	3.66	0	0	0	82	122	0.61	39	34	2	1	1	1
490	0.76	89	2	19.56	0	150	88	0	4.36	46	92	0	4.99	0	39.11	-0.58	4.08	3.47	0	0	0	78	147	0.56	32	59	2	1	1	0
491	0.9	83	2	23.18	0	141	97	1	4.69	50	105	0	4.5	0	53.68	0.02	3.66	4.29	1	1	1	109	90	1.02	73	39	4	1	1	1
492	1.23	86	1	25.47	0	128	67	1	4.23	47	92	0	4.48	0	67.13	0.06	2.56	2.94	1	1	0	69	88	1.06	19	13	4	1	1	1
493	0.69	69	1	15.62	3	114	85	0	4.85	61	70	0	4.9	0	128.46	-0.15	4.08	4.3	0	0	0	128	134	0.86	74	59	3	1	1	0
494	1.15	83	1	21.34	0	114	57	1	3.81	51	71	0	4.91	0	52.84	-0.19	2.71	3.58	1	1	0	45	135	0.83	36	15	3	1	1	1
495	0.91	77	2	32.7	0	163	92	1	4.89	43	99	0	4.66	1	59.03	-0.78	2.71	2.4	1	1	0	133	106	0.46	11	15	1	1	1	1
496	1.1	77	2	19.84	0	125	70	1	4.8	52	180	0	4.66	0	42.13	-0.31	1.61	2.4	0	0	0	121	106	0.73	11	5	3	1	1	1
497	1.17	83	2	26.91	0	136	68	1	5.07	36	122	0	5.43	1	47.57	-0.65	2.08	2.71	1	1	1	159	229	0.52	15	8	2	1	1	1
498	1.03	82	2	21.4	0	108	64	0	4.08	83	68	0	4.7	0	53.12	-0.87	2.56	3.26	1	0	1	59	110	0.42	26	13	1	1	1	0
499	0.78	91	2	29.07	0	192	92	1	4.33	69	234	1	4.41	0	49.47	0	2.08	2.3	0	0	0	76	82	1	10	8	4	0	0	1
500	1.03	82	2	19.14	0	156	86	0	4.8	40	146	1	5.02	0	110.29	-0.89	1.95	3.04	1	1	0	121	151	0.41	21	7	1	1	1	1
501	1.05	85	1	24.42	3	103	64	1	4.25	50	84	0	4.19	0	47.42	0.01	2.56	2.48	0	0	0	70	66	1.01	12	13	3	1	0	1
502	0.81	79	2	18.94	0	118	63	0	4.23	32	87	0	4.99	0	87.33	0.03	2.2	2.48	0	0	0	69	147	1.03	12	9	4	1	1	0
503	0.9	68	2	27.56	0	122	76	1	5.08	39	132	0	5	1	54.52	-0.21	3.53	3.04	0	0	0	161	148	0.81	21	34	3	1	1	1
504	1.05	72	1	23.55	0	84	53	0	4.85	28	132	0	4.91	0	31.41	-0.62	3.47	3.26	1	1	0	128	136	0.54	26	32	1	1	1	0
505	1.1	79	1	19.19	2	137	71	1	4.3	136	59	0	4.54	0	62.12	-0.84	2.89	4.03	0	0	0	74	94	0.43	56	18	1	1	1	1
506	0.73	80	2	22.38	0	99	45	1	4.17	53	49	0	4.88	0	37.85	-0.11	2.94	2.94	0	0	0	65	132	0.9	19	19	4	0	0	1
507	0.83	70	1	20.55	3	122	73	0	4.06	58	79	0	4.58	0	74.17	0.17	2.89	3.43	1	1	0	58	98	1.19	31	18	4	0	0	0
508	1.08	84	2	19.85	0	142	95	0	4.29	50	101	0	4.45	0	49.94	-0.37	2.08	2.3	1	1	0	73	86	0.69	10	8	3	1	1	0
509	0.69	83	2	22.84	0	166	91	1	4.17	83	85	1	4.66	1	65.72	0.38	2.71	2.89	1	1	0	65	106	1.46	18	15	4	1	1	1
510	1.08	80	1	23.88	0	102	59	0	4.04	42	79	0	4.64	0	58.34	-1.05	2.3	2.4	0	0	0	57	104	0.35	11	10	1	0	0	0
511	0.88	94	2	16.52	0	90	59	0	4.51	46	117	0	4.88	0	73.39	-0.14	2.71	2.2	0	0	0	91	131	0.87	9	15	3	1	1	0
512	0.9	84	2	23.11	0	120	65	0	4.13	32	99	1	5.04	0	58.47	-0.39	3.4	2.3	0	0	0	62	155	0.68	10	30	3	1	1	1
513	1.05	84	1	22.89	2	145	69	0	3.69	49	77	0	4.57	0	58.2	0.31	2.4	2.48	0	0	0	40	97	1.37	12	11	4	1	1	0
514	1.2	94	2	17.68	0	119	64	0	4.2	44	101	0	4.67	0	51.8	0.29	2.71	2.2	1	0	1	67	107	1.34	9	15	4	1	1	0
515	0.93	82	2	24.79	0	118	47	1	4.44	44	65	0	4.8	0	38.77	-0.25	3.3	3.18	1	1	0	85	122	0.78	24	27	3	1	1	1
516	0.93	91	2	18.72	0	140	99	0	4.47	49	97	0	5.04	0	61.89	0.04	3.3	3	1	0	1	87	154	1.04	20	27	4	1	1	0
517	0.73	70	2	21.17	0	139	84	1	4.91	58	87	0	4.61	0	53.34	0.07	3.61	4.14	1	1	0	136	100	1.07	63	37	4	1	1	1
518	0.85	86	2	17.69	0	142	96	1	5.25	29	165	0	4.45	0	69.81	-0.82	1.61	2.3	1	1	0	191	86	0.44	10	5	1	1	1	1
519	1	75	2	24.92	0	147	73	0	4.16	51	139	0	4.82	0	65.42	-0.51	1.95	2.3	1	1	0	64	124	0.6	10	7	2	1	1	0
520	0.88	86	1	22.77	0	120	80	0	3.85	58	115	0	5.4	0	50.69	0.03	2.71	3	0	0	0	47	222	1.03	20	15	4	0	0	0
521	0.85	91	1	23.98	0	104	54	1	4.72	61	172	0	4.96	0	55.58	-0.2	2.4	3.09	0	0	0	112	142	0.82	22	11	3	0	0	1
522	1.03	88	2	16.4	0	186	72	0	4.84	72	156	0	5.12	0	84.67	-0.29	2.2	2.3	0	0	0	126	168	0.75	10	9	3	1	1	0
523	1.05	85	1	20.89	3	131	65	0	4.6	42	132	0	4.69	0	71.14	-1.43	2.2	2.4	1	1	0	99	109	0.24	11	9	1	1	1	0
524	1.15	94	2	22.96	0	152	72	1	4.57	49	143	0	4.91	0	62.35	-0.2	2.77	3.04	0	0	0	97	135	0.82	21	16	3	1	1	1
525	0.68	73	1	14.71	3	108	75	1	4.26	81	106	0	4.68	0	62.78	-0.16	2.77	3.22	0	0	0	71	108	0.85	25	16	3	1	1	1
526	0.84	65	1	23.94	0	142	82	0	4.03	59	118	0	5.16	0	69.94	0.05	2.83	3.53	0	0	0	56	175	1.05	34	17	4	0	0	0
527	0.8	63	2	23.27	0	154	59	1	4.94	73	85	0	5.55	0	44.63	-0.08	3.61	4.14	0	0	0	140	258	0.92	63	37	4	0	0	1
528	0.83	70	2	23.57	0	117	90	1	4.47	43	75	0	4.43	0	41.45	-0.12	2.71	3.69	0	0	0	87	84	0.89	40	15	4	1	1	1
529	0.72	73	2	18.03	0	164	79	1	3.97	76	108	0	4.61	0	39.26	-0.06	2.56	3.91	0	0	0	53	100	0.94	50	13	4	1	1	1
530	1	89	2	25.95	0	113	59	1	5.62	45	89	1	4.91	0	51.88	-0.36	2.4	2.89	1	0	1	277	135	0.7	18	11	3	1	1	1
531	1.1	86	1	26.18	0	97	64	1	4.29	49	86	0	4.57	0	68.03	-0.09	2.4	2.77	1	1	0	73	97	0.91	16	11	3	1	1	1
532	0.85	80	2	18.39	0	136	71	1	4.45	62	123	0	4.65	0	55.84	-0.17	3.33	2.71	0	0	0	86	105	0.84	15	28	3	1	1	1
533	0.62	71	2	18.84	0	91	63	0	4.23	61	103	0	4.62	0	79.55	-0.71	2.77	2.48	0	0	0	69	101	0.49	12	16	1	0	0	0
534	0.92	82	1	24.25	0	134	81	0	4.48	35	106	0	5.24	0	57.93	-0.29	2.64	3.47	0	0	0	88	189	0.75	32	14	3	1	1	0
535	1	78	2	21.11	0	121	56	0	5.5	49	145	0	5.4	1	85.77	-0.92	2.2	3.85	0	0	0	245	221	0.4	47	9	1	1	1	1
536	1.04	74	1	29.96	0	173	73	1	5.06	44	112	0	5.2	1	58.98	-0.67	2.77	3.26	0	0	0	158	182	0.51	26	16	1	1	1	1
537	0.92	88	2	14.84	0	87	46	1	4.16	59	84	0	4.72	0	45.62	-0.63	3.09	3.3	0	0	0	64	112	0.53	27	22	2	1	1	1
538	0.77	91	2	20.31	0	151	93	1	4.47	47	113	0	5.37	0	42.03	-0.48	3.37	3.04	0	0	0	87	214	0.62	21	29	2	1	1	1
539	1.43	78	2	23.2	0	163	61	1	5.19	35	127	0	4.73	0	51.02	-0.84	2.4	2.4	1	1	1	179	113	0.43	11	11	1	1	1	1
540	0.88	82	1	16.93	3	98	61	1	4.11	41	86	0	4.62	0	73.95	-0.49	2.71	2.89	0	0	0	61	101	0.61	18	15	2	1	1	1
541	1.03	91	2	21.43	0	106	59	0	3.97	44	57	0	4.96	0	38.86	0.25	2.48	3.3	1	1	0	53	142	1.29	27	12	4	1	1	0
542	0.9	79	2	23.93	0	145	78	1	4.61	41	111	0	5.26	1	61.39	-0.34	2.64	2.64	0	0	0	100	192	0.71	14	14	3	0	0	1
543	1.3	81	2	17.46	0	127	101	1	4.39	56	105	0	5.12	0	65.07	-0.46	2.89	2.56	0	0	0	81	168	0.63	13	18	2	1	1	1
544	0.82	83	2	23.23	0	136	68	1	4.3	48	139	0	4.64	0	76.06	0.38	2.83	2.56	1	1	0	74	104	1.46	13	17	4	1	1	1
545	1.07	87	2	21.59	0	176	97	0	4.22	69	133	0	4.65	0	50.8	-0.33	2.4	2.48	0	0	0	68	105	0.72	12	11	3	1	1	0
546	1.12	80	2	19.96	0	126	103	1	3.81	32	107	0	5.08	1	58.39	0.57	3.14	4.14	0	0	0	45	160	1.77	63	23	4	1	1	1
547	1.33	84	1	19.47	0	139	59	1	4.09	52	75	0	4.69	0	53.8	0.25	2.48	2.48	1	0	1	60	109	1.28	12	12	4	1	1	1
548	0.84	81	2	18.31	0	119	85	1	4.19	73	127	0	4.96	0	47.9	-0.02	2.83	3.3	1	1	0	66	143	0.98	27	17	4	1	1	1
549	0.85	73	2	21.58	0	114	51	1	4.5	98	130	0	4.22	1	59.05	0.33	2.08	3.14	0	0	0	90	68	1.39	23	8	4	1	1	1
550	1.13	84	1	19.8	0	115	62	0	4.22	58	88	0	4.6	0	100.6	-0.09	2.83	2.2	1	1	0	68	99	0.91	9	17	3	1	1	0
551	2	86	1	17.45	3	147	86	0	4.06	49	136	0	4.84	0	99.92	0.32	2.94	2.77	1	1	0	58	126	1.38	16	19	4	1	1	0
552	1	84	1	21.19	3	142	78	1	4.09	51	103	0	4.64	0	100.6	-0.48	3.33	3.4	1	1	1	60	104	0.62	30	28	2	1	1	1
553	1.45	85	1	17.65	3	126	74	0	4.42	67	137	0	4.86	0	61.58	0.41	2.4	2.4	0	0	0	83	129	1.51	11	11	4	1	1	0
554	1.15	77	2	19.68	0	141	96	1	3.81	85	71	0	5.27	0	79.26	0.18	2.83	2.56	1	1	0	45	194	1.2	13	17	4	1	1	1
555	1.04	92	2	18.65	0	129	60	1	4.01	50	86	1	4.7	0	34.59	0.26	1.79	2.94	0	0	0	55	110	1.3	19	6	4	1	1	1
556	0.76	92	1	20.05	0	143	63	0	4.22	58	94	0	4.98	0	33.04	-0.97	3.04	3.22	1	1	0	68	146	0.38	25	21	1	1	1	0
557	0.95	80	2	18.31	0	126	64	1	4.33	68	112	1	5.19	1	70	-0.8	3.53	3.69	0	0	0	76	180	0.45	40	34	1	1	1	1
558	0.98	83	1	26.14	3	142	59	1	4.11	53	101	0	4.84	0	73.69	-0.63	2.48	3.26	0	0	0	61	127	0.53	26	12	1	1	1	1
559	1.1	79	2	21.43	0	108	94	1	5.1	36	44	1	4.62	0	133.16	-0.37	2.48	2.4	1	1	0	164	102	0.69	11	12	3	1	1	1
560	0.8	72	2	22.01	0	117	51	1	3.78	59	60	1	4.51	1	47.73	-0.56	3.14	3.3	1	0	1	44	91	0.57	27	23	2	0	0	1
561	1.25	86	1	18.71	0	162	58	1	4.17	53	146	0	5.11	1	62.92	-0.51	2.71	2.48	0	0	0	65	165	0.6	12	15	2	1	1	1
562	1.25	84	1	23.44	3	129	41	1	4.85	42	172	0	5.14	0	64.98	-0.54	3.14	4.08	1	1	0	128	171	0.58	59	23	2	1	1	1
563	1.08	78	1	16.39	3	104	65	0	4.29	60	92	0	4.53	0	69.03	-0.48	1.79	2.48	0	0	0	73	93	0.62	12	6	2	1	1	0
564	0.88	82	2	14.08	0	82	55	0	4.19	43	75	0	4.52	0	151.08	-0.16	2.4	3.18	0	0	0	66	92	0.85	24	11	3	1	1	0
565	1.2	89	2	18.27	0	146	112	1	4.64	49	100	0	4.56	0	54.96	-0.31	2.4	2.48	1	1	0	104	96	0.73	12	11	3	1	1	1
566	1.7	80	1	23.92	3	174	96	0	4.6	51	108	0	4.97	0	54.56	-0.15	2.2	3	0	0	0	99	144	0.86	20	9	3	1	1	0
567	1.31	82	1	19.11	3	123	70	1	3.89	88	91	0	5.56	1	70.88	-0.71	2.77	2.64	0	0	0	49	259	0.49	14	16	1	1	1	1
568	1.05	88	1	21.89	3	116	87	1	3.58	79	95	0	4.62	0	50.36	0.41	3.04	3.71	1	1	0	36	101	1.51	41	21	4	1	1	1
569	0.93	89	2	19.22	0	158	92	0	4.55	53	102	0	5.09	0	74.55	-0.04	1.39	2.71	0	0	0	95	163	0.96	15	4	4	1	1	0
570	0.9	87	2	19.25	0	90	61	0	5.35	21	109	0	5.48	1	46.34	-0.26	2.56	3.53	1	1	0	210	240	0.77	34	13	3	1	1	1
571	0.89	75	2	24.86	0	138	75	0	4.63	59	124	0	5.21	1	70.05	-0.62	3.33	3.61	0	0	0	103	183	0.54	37	28	2	0	0	1
572	1.08	80	2	25.95	0	129	67	1	5.06	52	124	1	4.64	0	37.09	-0.02	1.61	2.48	0	0	0	157	104	0.98	12	5	4	1	1	1
573	1.11	84	2	21.89	0	145	76	0	3.43	73	96	0	4.62	0	78.87	-0.31	2.77	2.08	1	1	0	31	102	0.73	8	16	3	1	1	0
574	0.98	85	1	19.67	0	139	83	0	4.34	44	65	0	4.69	0	67.35	0.12	2.3	2.48	0	0	0	77	109	1.13	12	10	4	1	1	0
575	0.88	80	2	30.29	0	176	63	1	4.43	73	122	0	4.81	0	41.21	0.25	2.48	3.18	0	0	0	84	123	1.28	24	12	4	1	1	1
576	1.1	87	2	20.05	0	125	77	1	4.49	82	87	0	4.52	0	95.32	-0.13	2.71	2.83	1	1	0	89	92	0.88	17	15	3	1	1	1
577	1.35	84	1	19.55	3	144	66	1	4.29	49	86	0	4.23	0	52.66	-0.73	2.64	2.89	1	1	0	73	69	0.48	18	14	1	1	1	1
578	0.82	89	2	18.93	0	134	63	1	4.25	60	117	0	4.77	0	37.09	-0.58	2.77	2.71	0	0	0	70	118	0.56	15	16	2	1	1	1
579	0.77	69	2	13.24	0	134	60	0	3.97	61	106	0	4.6	0	64.85	-0.65	2.2	2.48	0	0	0	53	99	0.52	12	9	2	0	0	0
580	0.9	60	1	24.17	3	145	82	0	4.54	56	108	0	4.74	0	65.63	-0.3	2.71	3.76	0	0	0	94	115	0.74	43	15	3	0	0	0
581	0.84	80	2	22.37	0	151	74	0	4.57	63	108	1	4.65	0	49.98	0.03	3.14	3.37	0	0	0	97	105	1.03	29	23	4	0	0	1
582	0.82	80	2	22.65	0	152	103	1	5.11	51	198	1	5.54	1	60.22	-0.24	2.89	2.64	1	1	1	165	254	0.79	14	18	3	1	1	1
583	1.05	85	2	23.94	0	131	84	1	4.44	110	111	0	4.51	0	42.37	-1.27	2.3	2.77	1	1	0	85	91	0.28	16	10	1	1	1	1
584	0.92	72	2	23.1	0	133	70	1	3.93	71	129	1	4.72	0	74.83	-0.03	2.3	2.94	1	1	0	51	112	0.97	19	10	4	1	1	1
585	0.8	74	2	26.41	0	160	86	1	5.16	55	104	0	4.81	1	58.82	0.64	3.22	3.56	0	0	0	174	123	1.89	35	25	4	1	1	1
586	1.15	82	1	22.64	3	123	70	0	4.52	59	82	0	4.42	0	57.27	0.18	3.3	2.3	0	0	0	92	83	1.2	10	27	4	1	0	0
587	1.18	65	1	24.44	3	149	79	1	4.17	49	71	0	5.45	1	73.72	0.59	2.08	3.43	1	1	0	65	233	1.81	31	8	4	1	1	1
588	0.67	71	2	23.08	0	174	85	0	4.74	60	107	0	5.29	1	78.02	-0.01	2.56	3.37	0	0	0	114	199	0.99	29	13	4	0	0	1
589	0.95	84	2	19.67	0	118	65	1	4.14	137	143	1	4.5	0	46.81	-0.4	1.79	2.48	0	0	0	63	90	0.67	12	6	2	1	1	1
590	0.9	80	2	16.02	0	164	127	1	4.29	81	184	0	4.85	0	61.17	0.38	2.77	3.56	0	0	0	73	128	1.46	35	16	4	0	0	1
591	1.28	75	2	23.34	0	179	73	1	4.5	57	91	1	5.16	1	78.3	-0.94	3.04	2.48	0	0	0	90	175	0.39	12	21	1	1	1	1
592	0.66	66	1	25.51	1	115	76	1	4.13	55	91	0	4.61	0	47.75	-0.58	3.09	4.17	0	0	0	62	100	0.56	65	22	2	0	0	1
593	0.95	82	2	21.92	0	139	75	1	4.17	64	134	0	4.8	0	61.72	-0.69	2.94	2.56	0	0	0	65	121	0.5	13	19	1	1	1	1
594	1	77	2	27.77	0	151	75	1	5.06	71	88	0	4.41	0	91.99	-1.43	2.77	3.26	0	0	0	157	82	0.24	26	16	1	1	1	1
595	1.3	92	1	15.9	0	85	51	0	3.91	75	65	0	4.98	0	53.58	-0.89	3.22	3.81	0	0	0	50	146	0.41	45	25	1	1	1	0
596	0.76	72	2	21.11	0	109	71	0	4.62	62	115	0	5.19	0	70.88	-0.37	2.3	2.3	0	0	0	102	180	0.69	10	10	3	0	0	0
597	0.83	79	2	18.98	0	108	84	1	4.38	54	101	0	4.47	0	40.47	0.22	2.08	2.56	1	1	0	80	87	1.24	13	8	4	1	1	1
598	1.1	83	1	16.62	3	134	75	0	4.62	68	102	0	4.84	0	81.91	-0.4	2.83	3.43	1	1	0	101	127	0.67	31	17	2	1	1	0
599	1.15	84	2	20.82	0	142	75	1	3.93	52	77	0	5.58	0	49.28	-0.65	2.3	2.56	1	1	0	51	266	0.52	13	10	2	1	1	1
600	0.75	73	1	15.79	2	118	86	0	4.6	78	194	0	4.6	0	77.57	0.58	2.2	3.14	0	0	0	99	99	1.78	23	9	4	0	0	0
601	0.91	81	2	28.19	0	138	83	1	4.58	77	121	1	4.38	0	45.03	0.27	2.94	2.77	0	0	0	98	80	1.31	16	19	4	1	1	1
602	1	92	2	14.29	0	89	67	0	4.39	61	112	0	5.07	0	80.08	-0.33	1.95	2.56	0	0	0	81	159	0.72	13	7	3	1	1	0
603	1.05	75	2	14.93	0	114	76	1	3.91	50	83	0	4.57	0	160.86	-0.58	2.89	3.5	0	0	0	50	97	0.56	33	18	2	1	1	1
604	1.17	81	1	21.56	3	167	100	1	4.08	61	72	0	4.74	0	71.13	0.12	2.94	3.58	1	1	0	59	115	1.13	36	19	4	1	1	1
605	1.05	92	1	15.31	0	154	70	1	3.99	50	165	0	4.81	0	59.46	0.04	2.2	2.77	0	0	0	54	123	1.04	16	9	4	1	1	1
606	1.12	71	1	22.48	1	140	90	1	4.45	89	144	0	4.45	0	68.19	-0.36	2.2	2.94	1	1	0	86	86	0.7	19	9	2	1	1	1
607	1.1	86	2	19.11	0	139	84	0	4.29	38	89	0	4.62	0	61.88	-0.6	3.04	3.85	1	1	0	73	102	0.55	47	21	2	1	1	0
608	0.99	82	2	18.35	0	122	63	0	4.89	40	96	0	4.6	0	70.78	-0.4	2.83	2.71	0	0	0	133	99	0.67	15	17	2	1	1	0
609	1	89	1	24.14	3	138	62	0	4.33	25	87	0	4.84	0	55.94	-0.78	2.77	3.56	0	0	0	76	127	0.46	35	16	1	1	1	0
610	0.96	87	1	25.73	0	145	74	1	4.26	47	65	0	4.57	0	57.62	-0.04	2.64	3.22	1	1	1	71	97	0.96	25	14	3	1	1	1
611	0.75	69	1	26.75	2	132	102	0	4.51	63	162	0	4.66	0	66.19	0.18	2.89	4.06	0	0	0	91	106	1.2	58	18	4	0	0	0
612	1.5	81	1	17.53	0	108	72	1	4.19	45	89	0	4.87	1	72.13	-0.87	2.83	3.3	0	0	0	66	130	0.42	27	17	1	1	1	1
613	0.91	75	2	17.97	0	156	70	1	3.81	58	104	0	5.3	1	67.66	-0.94	2.56	2.4	0	0	0	45	201	0.39	11	13	1	1	1	1
614	1.17	87	2	26.53	0	163	59	1	4.64	63	66	0	4.78	0	36.58	-0.65	4.01	4.36	1	1	0	104	119	0.52	78	55	2	1	1	1
615	0.99	85	2	21.49	0	158	68	1	3.74	77	60	1	4.8	0	70.05	0.11	2.56	2.48	0	0	0	42	122	1.12	12	13	4	1	1	1
616	1.15	91	2	24.15	0	159	83	1	4.08	66	106	0	4.53	0	49.47	-0.29	2.2	2.3	1	1	0	59	93	0.75	10	9	3	1	1	1
617	0.93	68	1	21.53	3	145	80	0	3.71	55	90	0	4.45	0	68.16	-0.37	3.3	3.4	0	0	0	41	86	0.69	30	27	2	1	1	0
618	0.77	95	2	20.44	0	165	95	1	4.5	41	151	0	4.58	0	52.39	-0.63	2.89	3.37	0	0	0	90	98	0.53	29	18	2	1	1	1
619	1.04	96	2	17.08	0	102	61	1	4.22	49	63	0	5.02	0	54.58	-0.63	2.56	1.79	1	0	1	68	151	0.53	6	13	2	1	1	1
620	1.48	85	2	27.41	0	145	68	1	4.7	57	82	1	4.48	0	47.25	-0.15	2.4	2.94	0	0	0	110	88	0.86	19	11	3	1	1	1
621	0.81	78	2	22.68	0	136	80	1	4.97	54	90	1	4.64	1	42.93	-0.16	2.64	2.77	1	0	1	144	104	0.85	16	14	3	1	1	1
622	0.75	82	1	23.66	0	104	66	0	4.48	48	101	0	5.04	0	51.92	0.21	3.14	3.3	0	0	0	88	154	1.23	27	23	4	0	0	0
623	0.86	84	1	20.96	3	153	82	0	4.03	41	54	0	4.6	0	43.76	-0.25	3.53	3.4	1	1	0	56	99	0.78	30	34	3	1	1	0
624	1.04	83	2	22.32	0	131	86	0	4.85	72	130	0	4.7	0	52.93	-0.03	2.08	2.4	1	1	0	128	110	0.97	11	8	4	1	1	0
625	0.92	82	2	21.93	0	137	90	0	4.84	85	99	0	4.98	0	84.55	-0.71	2.48	4.36	1	1	0	127	146	0.49	78	12	1	1	1	0
626	0.7	80	2	24.02	0	118	63	0	4.26	49	103	0	5.14	1	100.07	-0.43	3.83	4.08	0	0	0	71	171	0.65	59	46	2	0	0	1
627	1.15	80	2	24.04	0	122	83	1	4.26	64	109	0	4.61	0	71.28	-0.24	3.18	3.26	1	1	1	71	100	0.79	26	24	3	1	1	1
628	0.69	65	1	28.22	0	130	82	1	4.54	47	84	1	4.64	1	61.22	-0.14	3.56	4.22	1	1	1	94	104	0.87	68	35	3	1	1	1
629	1.04	89	2	21.63	0	131	67	1	4.62	75	109	0	5.08	0	59.33	-0.51	2.71	3.04	0	0	0	102	160	0.6	21	15	2	1	1	1
630	1.13	86	2	20.08	0	163	84	0	4.06	61	53	0	4.72	0	68.56	-0.54	2.64	2.48	0	0	0	58	112	0.58	12	14	2	1	1	0
631	0.9	73	1	20.68	0	116	76	1	4.69	47	61	1	4.82	0	54.25	-0.54	3.58	3.74	1	1	0	109	124	0.58	42	36	2	0	0	1
632	0.8	80	2	19.96	0	108	83	0	4.51	80	103	0	4.78	0	49.98	-0.26	2.2	2.64	0	0	0	91	119	0.77	14	9	3	1	1	0
633	1	86	1	27.64	0	145	70	1	4.34	47	117	0	4.84	0	47.26	0.25	3.14	3.61	1	1	0	77	127	1.28	37	23	4	1	0	1
634	0.85	63	1	24.16	3	161	88	1	4.16	43	70	0	4.72	1	52.7	-1.27	2.71	3.87	1	0	1	64	112	0.28	48	15	1	1	1	1
635	1.12	87	1	17.34	3	141	86	1	4.43	75	70	0	5.24	0	52.69	0.4	1.79	3.26	0	0	0	84	188	1.49	26	6	4	1	1	1
636	1.25	86	1	23.57	0	109	83	1	4.72	50	79	0	4.65	0	43.08	-0.04	2.4	3.53	1	1	0	112	105	0.96	34	11	3	1	1	1
637	0.95	89	2	21.25	0	121	61	1	4.16	58	66	0	4.62	0	41.82	-0.21	2.2	3.58	1	1	0	64	101	0.81	36	9	3	0	0	1
638	1.28	83	1	22.45	3	143	71	1	4.41	51	119	0	5	0	71.63	-0.49	2.2	3.18	0	0	0	82	148	0.61	24	9	2	1	1	1
639	1.33	78	1	14.7	3	127	76	1	3.89	77	113	0	4.69	1	87.54	-0.12	1.95	3.09	0	0	0	49	109	0.89	22	7	3	1	1	1
640	1.17	94	2	23.59	0	133	46	0	4.67	68	148	0	5.34	1	47.72	0.17	2.83	3.61	1	1	1	107	209	1.19	37	17	4	1	1	1
641	0.8	88	2	19.5	0	139	67	0	4.48	69	97	0	5.01	1	41.95	-0.14	2.2	2.3	1	1	1	88	150	0.87	10	9	3	1	1	1
642	0.88	88	2	20.35	0	177	107	1	4.19	89	57	0	5.09	0	70.64	-0.78	3.74	2.89	1	1	1	66	163	0.46	18	42	1	1	1	1
643	0.96	82	2	15.61	0	172	88	0	4.2	78	102	0	4.48	0	52.38	-0.16	3.78	3.74	0	0	0	67	88	0.85	42	44	3	1	1	0
644	0.88	63	2	25.95	3	122	66	0	3.71	67	101	1	4.8	0	80.74	-0.43	2.56	3.26	0	0	0	41	121	0.65	26	13	2	0	0	1
645	0.64	67	1	24.77	0	84	62	0	4.06	38	54	0	4.53	0	97.91	-0.73	2.3	2.08	0	0	0	58	93	0.48	8	10	1	0	0	0
646	1.08	88	2	24.81	0	206	101	0	4.76	51	147	0	4.58	0	51.33	-0.82	1.79	2.4	1	1	0	117	98	0.44	11	6	1	1	1	0
647	0.68	65	1	24.69	3	124	62	0	4.22	58	87	0	4.63	0	112.6	0.33	3.09	3.76	0	0	0	68	103	1.39	43	22	4	0	0	0
648	0.9	81	2	23.76	0	126	73	1	4.98	48	242	1	4.88	0	86.7	0.31	2.64	2.4	0	0	0	146	131	1.36	11	14	4	1	1	1
649	1.14	88	1	20.01	0	129	66	1	4.43	58	119	0	4.77	0	64.11	0.03	2.2	3.22	1	1	0	84	118	1.03	25	9	4	1	1	1
650	0.89	71	1	18.33	0	133	90	1	4.26	42	81	0	4.84	0	185.8	-0.33	3.09	3.66	1	1	0	71	127	0.72	39	22	2	1	1	1
651	1.55	73	1	22.16	3	142	80	1	4.26	93	118	0	4.93	1	78.72	-0.27	3.47	3.14	0	0	0	71	138	0.76	23	32	3	1	1	1
652	1.1	65	1	26.37	3	160	73	0	4.55	61	141	0	4.71	0	54.37	0.35	2.83	3.53	1	1	0	95	111	1.42	34	17	4	1	1	0
653	1.06	85	2	18.24	0	119	58	1	4.58	60	84	0	4.54	0	70.05	-0.17	2.3	2.48	1	1	0	98	94	0.84	12	10	3	1	1	1
654	0.94	72	1	20.93	3	124	66	1	4.53	82	123	0	4.96	1	66.21	-0.27	3.14	3.83	0	0	0	93	142	0.76	46	23	3	1	1	1
655	0.93	85	1	17.97	3	84	53	0	3.83	52	68	0	4.53	0	115.71	-0.39	1.95	2.77	1	1	0	46	93	0.68	16	7	2	1	1	0
656	1.35	81	1	22.76	3	139	95	0	5.8	36	62	0	4.69	0	86.59	-0.3	2.4	4.03	1	1	1	331	109	0.74	56	11	3	1	1	0
657	0.76	68	2	29.07	3	125	95	1	4.09	50	122	0	4.87	1	87.34	-0.37	2.4	2.77	0	0	0	60	130	0.69	16	11	3	0	0	1
658	0.65	63	2	20.03	0	142	90	0	4.16	46	70	0	4.99	0	55.73	0.14	3.14	4.25	0	0	0	64	147	1.15	70	23	4	0	0	0
659	1.16	86	2	22.96	0	126	57	0	4.04	29	88	0	4.98	0	69.81	-0.36	2.56	3.53	0	0	0	57	145	0.7	34	13	3	1	1	0
660	1.23	87	1	22.64	1	134	61	1	4.43	44	95	0	4.68	0	45.35	-0.39	3.04	3.76	1	0	1	84	108	0.68	43	21	2	1	1	1
661	1.15	90	2	24.29	0	145	68	1	4.19	58	84	0	4.55	0	53.21	0.11	2.2	2.4	1	1	0	66	95	1.12	11	9	4	1	1	1
662	1	86	2	28.41	0	144	73	1	4.28	69	97	1	4.81	0	59.92	-0.89	2.48	2.64	0	0	0	72	123	0.41	14	12	1	1	1	1
663	1.23	91	2	19.17	0	139	92	1	4.16	61	54	0	5.1	0	30.51	-0.62	2.3	1.95	1	0	0	64	164	0.54	7	10	2	1	1	1
664	1.1	89	1	18.9	3	117	68	0	4.2	66	91	0	5.12	0	71.2	-0.46	2.4	2.56	0	0	0	67	167	0.63	13	11	2	1	1	0
665	1.03	84	1	23.29	0	113	46	1	3.4	57	71	0	4.44	1	49.01	-0.2	1.79	2.4	0	0	0	30	85	0.82	11	6	3	1	1	1
666	1.05	77	1	24.03	3	135	75	0	3.89	131	39	0	4.91	0	39.21	0.48	2.64	3.22	1	1	0	49	135	1.61	25	14	4	1	0	0
667	0.99	73	1	19.69	0	136	92	1	4.23	26	86	0	4.72	0	72.28	-0.82	2.08	3	1	1	0	69	112	0.44	20	8	1	1	1	1
668	0.94	80	1	21.6	0	161	102	1	4.08	82	76	0	4.52	0	47.79	-0.62	2.2	3.14	1	1	0	59	92	0.54	23	9	1	1	1	1
669	1.04	86	2	20.48	0	148	95	1	4.44	36	88	0	4.3	0	111.85	-0.58	1.61	2.4	1	1	0	85	74	0.56	11	5	2	1	1	1
670	0.85	87	2	20.36	0	165	87	1	4.3	70	75	0	4.45	0	95.32	-0.45	2.77	3.04	0	0	0	74	86	0.64	21	16	2	1	1	1
671	1.64	80	2	17.9	0	116	70	0	3.91	46	85	0	4.96	0	95.32	-1.24	1.79	2.71	1	1	0	50	142	0.29	15	6	1	1	1	0
672	1.06	84	1	24.66	2	118	69	0	4.47	36	62	0	4.76	1	45.38	-0.73	2.64	3.95	1	0	0	87	117	0.48	52	14	1	1	1	1
673	0.96	89	2	16.68	0	131	66	0	3.89	57	41	0	4.6	0	102.13	-0.65	3.14	2.94	1	1	0	49	99	0.52	19	23	2	1	1	0
674	0.95	96	2	21.76	0	123	56	1	4.3	67	77	0	4.74	0	39.55	-0.01	2.3	2.89	1	1	0	74	114	0.99	18	10	4	1	1	1
675	0.85	72	1	22.81	0	104	58	0	5.2	37	81	0	5.12	1	75.67	-0.6	2.89	2.77	1	1	0	182	168	0.55	16	18	2	1	1	1
676	0.85	89	2	21.65	0	102	88	1	4.11	64	73	0	4.75	0	43.31	0.21	2.3	2.3	0	0	0	61	116	1.23	10	10	4	1	1	1
677	1.57	76	2	16.38	0	121	74	1	3.99	50	83	0	4.62	0	92.34	-1.11	2.77	1.95	0	0	0	54	101	0.33	7	16	1	1	1	1
678	1.04	78	2	36.2	0	126	81	1	5.28	51	116	1	4.77	0	30.06	-0.33	2.2	2.64	0	0	0	197	118	0.72	14	9	3	1	1	1
679	1.13	78	1	16.73	3	146	92	0	4.73	46	140	0	4.68	0	80.82	0.5	2.56	2.3	1	1	1	113	108	1.65	10	13	4	1	1	0
680	0.95	87	2	24.46	0	132	73	1	4.29	80	73	0	4.85	0	31.73	-0.34	3	2.77	1	0	1	73	128	0.71	16	20	3	1	1	1
681	0.9	93	2	35.71	0	138	79	0	4.62	52	74	0	4.82	0	55.08	-0.39	2.94	3.22	1	0	1	102	124	0.68	25	19	3	1	1	0
682	0.77	82	2	20.79	0	146	79	1	3.85	86	83	0	5.15	0	60.74	0.23	1.79	3.18	0	0	0	47	172	1.26	24	6	4	1	1	1
683	1.13	80	2	27.57	0	180	68	1	4.36	49	133	0	5.06	0	50.65	-0.46	2.48	2.89	0	0	0	78	157	0.63	18	12	2	1	1	1
684	1.15	87	1	21.01	0	115	66	1	3.85	68	93	0	5.94	0	40.41	-0.15	2.64	2.89	0	0	0	47	381	0.86	18	14	3	1	1	1
685	0.99	71	1	20.1	0	109	68	0	5.25	34	79	0	4.63	0	83.03	-0.14	3.09	2.64	0	0	0	190	103	0.87	14	22	3	1	1	0
686	1.08	78	2	19.9	0	123	77	1	4.47	37	137	0	5.14	0	51.7	-0.37	2.56	2.2	1	1	0	87	170	0.69	9	13	3	1	1	1
687	0.87	75	2	30.11	0	184	102	1	4.32	72	88	0	4.65	0	68.84	0.1	3.09	2.94	1	0	1	75	105	1.11	19	22	4	1	1	1
688	1.45	87	1	21.24	0	137	84	0	3.69	49	80	0	4.78	0	44.93	0.25	1.1	2.77	0	0	0	40	119	1.29	16	3	4	1	1	0
689	0.89	88	2	16.85	0	113	66	1	3.97	42	56	0	4.62	0	73.36	-0.73	2.71	2.64	0	0	0	53	101	0.48	14	15	1	1	1	1
690	0.85	85	1	21.99	3	110	76	1	3.64	60	74	0	4.8	0	42.84	-0.01	2.4	2.83	1	1	0	38	121	0.99	17	11	3	1	1	1
691	0.74	79	2	16.96	0	157	77	1	4.26	68	34	0	4.71	0	91.32	-0.71	2.77	2.71	0	0	0	71	111	0.49	15	16	1	1	1	1
692	1.17	83	2	20.26	0	188	79	1	4.22	67	91	0	4.96	0	56.07	-0.67	2.71	2.48	1	1	1	68	142	0.51	12	15	1	1	1	1
693	1	86	2	17.5	0	113	61	1	4.08	44	92	0	5.22	1	69.81	-0.6	3.56	3.22	1	1	0	59	185	0.55	25	35	2	1	1	1
694	0.96	96	2	15.98	0	158	95	1	4.28	65	91	0	4.34	0	51.49	-0.73	2.56	2.77	0	0	0	72	77	0.48	16	13	1	1	1	1
695	0.9	68	1	24.24	0	137	68	1	4.44	49	77	0	4.62	0	80.34	-0.12	2.89	3.22	1	0	1	85	102	0.89	25	18	3	0	0	1
696	1.11	86	2	21.82	0	142	61	1	4.63	39	147	0	4.98	1	34.59	-1.27	2.89	3.22	1	1	1	103	145	0.28	25	18	1	1	1	1
697	1.3	86	1	22.53	0	142	68	1	4.8	43	104	0	5.04	0	64.54	-1.24	2.56	2.89	1	1	0	121	154	0.29	18	13	1	1	1	1
698	1.13	85	1	21.73	0	130	67	1	4.39	69	96	0	5.16	0	58	-0.49	2.4	2.4	1	1	0	81	175	0.61	11	11	2	1	1	1
699	0.89	91	2	19.64	0	124	77	1	3.97	43	70	0	5.06	0	42.03	0.43	2.3	4.09	1	1	0	53	157	1.54	60	10	4	1	1	1
700	1.33	92	2	21.33	0	123	65	1	4.16	91	102	0	4.91	0	49.99	-0.17	2.48	2.4	0	0	0	64	136	0.84	11	12	3	1	1	1
701	0.78	69	1	20.46	3	149	95	0	4.03	70	113	0	5.53	1	54	-0.08	2.4	3.14	0	0	0	56	251	0.92	23	11	3	1	1	1
702	0.96	71	1	24.61	3	174	96	1	4.69	37	107	1	4.67	1	83.03	-0.21	2.48	2.48	1	1	0	109	107	0.81	12	12	3	1	1	1
703	0.75	80	2	23.34	0	165	114	1	4.97	68	114	0	4.81	0	49.98	-0.33	2.56	3.47	1	1	1	144	123	0.72	32	13	3	1	1	1
704	1.05	85	2	16.9	0	99	49	1	3.83	65	67	0	5.01	0	47.85	-1.17	2.56	2.08	1	1	0	46	150	0.31	8	13	1	1	1	1
705	0.72	79	2	17.71	3	135	67	0	4.06	59	51	0	4.62	0	83.66	0.03	2.48	2.56	0	0	0	58	102	1.03	13	12	4	1	1	0
706	1.08	89	2	24.29	0	144	90	0	5.12	55	111	0	4.7	0	51.88	-0.49	2.3	2.71	1	1	0	168	110	0.61	15	10	2	1	0	0
707	1.08	87	1	22.55	2	116	64	1	4.9	52	105	0	4.77	0	69.69	-0.11	3.09	2.71	0	0	0	134	118	0.9	15	22	3	1	0	1
708	0.95	90	2	20.79	0	174	93	0	3.99	64	79	0	4.88	0	74.31	-0.22	2.71	3.47	0	0	0	54	132	0.8	32	15	3	1	1	0
709	0.64	62	2	20.24	0	136	76	1	4.23	66	68	0	4.7	0	67.97	-0.31	2.56	3.04	0	0	0	69	110	0.73	21	13	3	0	0	1
710	0.91	89	1	13.51	1	148	108	0	4.74	48	108	0	5.22	0	68.29	-1.39	2.4	2.64	0	0	0	114	185	0.25	14	11	1	1	1	0
711	1.1	71	2	24.03	0	170	87	0	4.75	65	144	0	4.65	0	36.55	-0.21	3.66	4.11	0	0	0	116	105	0.81	61	39	3	1	0	0
712	1.26	82	2	18.39	0	135	75	1	3.83	66	71	0	4.92	0	69.51	-0.09	3.04	2.4	0	0	0	46	137	0.91	11	21	4	1	1	1
713	1.13	82	2	19.84	0	122	74	1	4.04	57	90	0	4.51	0	57.11	-0.71	2.71	2.4	0	0	0	57	91	0.49	11	15	1	1	1	1
714	1.08	87	2	20.5	0	139	84	0	3.58	72	76	0	4.8	0	58.79	0	2.56	2.4	0	0	0	36	122	1	11	13	4	1	1	0
715	0.92	91	2	21.24	0	169	92	0	4.23	60	133	0	4.76	0	55.43	-0.31	1.95	2.77	0	0	0	69	117	0.73	16	7	3	1	1	0
716	0.93	80	2	18.53	0	137	64	0	4.53	49	102	0	4.67	0	55.04	-0.99	1.79	2.4	0	0	0	93	107	0.37	11	6	1	1	1	0
717	1.05	79	2	26.21	0	136	69	0	4.48	50	140	0	5.67	0	37.61	-0.54	2.56	3.33	0	0	0	88	290	0.58	28	13	2	1	1	0
718	1.04	95	1	22.52	0	126	81	1	4.37	56	122	0	4.61	1	35.78	0.57	2.71	3	1	1	0	79	100	1.77	20	15	4	1	1	1
719	1.1	81	2	29.4	0	141	77	1	4.65	53	151	0	4.55	0	71.03	-0.37	3.76	4.09	1	1	0	105	95	0.69	60	43	3	1	1	1
720	0.77	87	2	12.06	0	177	76	0	4.28	62	48	0	4.74	0	65.97	-0.73	3.26	2.4	0	0	0	72	114	0.48	11	26	1	1	1	0
721	1.03	89	2	23.37	0	165	67	1	4.74	82	110	0	4.82	0	90.3	-0.24	2.77	2.64	1	1	0	114	124	0.79	14	16	3	1	1	1
722	1.43	80	1	20.63	0	135	70	0	4.08	43	66	0	4.72	0	91.44	-0.99	2.71	3	1	1	0	59	112	0.37	20	15	1	1	1	0
723	0.89	90	2	20.63	0	134	72	1	5.25	55	54	0	4.75	0	43.17	-0.21	2.48	2.89	1	1	0	191	116	0.81	18	12	3	0	0	1
724	1.11	87	2	24.69	0	141	88	1	4.03	42	87	0	4.66	0	36.21	-0.33	2.3	3.56	1	1	0	56	106	0.72	35	10	3	1	1	1
725	0.67	84	2	25.74	0	146	86	1	4.49	79	80	0	4.63	0	48.64	-0.12	3.04	3.18	1	1	0	89	103	0.89	24	21	4	1	1	1
726	1.04	91	2	20.64	0	119	63	1	4.29	29	63	0	4.7	0	40.16	-0.99	2.77	3.4	1	1	0	73	110	0.37	30	16	1	1	1	1
727	0.98	88	1	20	0	111	55	0	3.76	53	158	0	4.3	0	40.62	-1.14	2.08	2.71	0	0	0	43	74	0.32	15	8	1	1	1	0
728	0.82	84	1	23.81	3	111	51	1	4.57	46	94	0	5.18	0	54.99	-0.49	2.3	2.71	0	0	0	97	178	0.61	15	10	2	1	1	1
729	0.83	85	2	23.32	0	91	51	1	4.3	41	52	0	5.08	0	38.38	-0.3	3.71	3.14	1	1	0	74	161	0.74	23	41	3	1	1	1
730	1.15	86	1	21.17	0	137	88	1	3.83	62	162	1	5.44	1	88.03	-0.06	2.2	2.3	1	1	0	46	231	0.94	10	9	3	1	1	1
731	1.1	83	1	24.3	0	106	67	1	4.42	37	78	0	4.66	0	30.35	-0.87	3.14	3.26	1	1	0	83	106	0.42	26	23	1	1	1	1
732	1.05	90	1	19.8	2	150	92	1	3.91	67	104	0	4.43	0	56.4	-0.63	2.08	2.3	0	0	0	50	84	0.53	10	8	1	1	1	1
733	1.35	90	2	18.08	0	158	82	1	4.55	69	121	0	4.47	0	41.21	-0.84	2.56	2.3	1	1	0	95	87	0.43	10	13	1	1	1	1
734	1.15	72	1	28.68	3	141	78	1	4.26	53	77	1	4.52	0	34.95	-0.58	3.37	3.14	1	1	0	71	92	0.56	23	29	2	1	0	1
735	1.01	83	2	20.26	0	168	71	1	4.43	57	97	0	4.75	0	41.24	-0.73	1.39	2.3	1	1	1	84	116	0.48	10	4	1	1	1	1
736	0.77	90	1	19.16	3	198	116	0	4.29	90	75	0	4.93	0	65.38	-0.08	2.71	3.66	0	0	0	73	138	0.92	39	15	3	1	1	0
737	0.8	66	2	23.72	0	170	100	1	4.45	68	105	0	4.53	0	58.16	-0.99	2.2	3.97	0	0	0	86	93	0.37	53	9	1	0	0	1
738	1.03	85	2	18.56	0	150	71	0	5.04	59	144	0	4.62	0	57.38	-0.3	2.4	2.48	1	1	0	154	101	0.74	12	11	3	1	1	0
739	1.12	84	2	18.24	0	99	43	1	4.03	84	71	1	4.52	0	62.29	-0.48	2.48	3.85	1	0	1	56	92	0.62	47	12	2	1	1	1
740	1	64	2	22.55	0	113	64	0	5.13	36	129	0	4.84	1	57.84	-0.82	2.3	2.4	0	0	0	169	127	0.44	11	10	1	1	1	1
741	0.69	84	2	22.76	0	165	80	0	4.41	33	106	0	4.64	0	62.29	-0.45	2.48	2.4	0	0	0	82	104	0.64	11	12	2	0	0	0
742	1.27	81	1	15.82	3	95	61	0	4.09	55	100	0	4.88	0	81.19	0.66	2.08	2.77	0	0	0	60	132	1.93	16	8	4	1	1	0
743	0.81	83	2	21.64	0	168	84	1	5.43	48	93	1	4.57	0	62.51	-0.12	2.64	2.83	1	0	1	228	97	0.89	17	14	4	1	1	1
744	1.1	91	2	17.97	0	134	80	1	4.51	46	80	0	4.49	0	72.66	-0.99	2.2	2.48	1	1	0	91	89	0.37	12	9	1	1	1	1
745	1.07	90	2	28.38	0	153	82	1	4.75	56	151	0	4.89	0	57.32	-0.53	4.06	3.95	0	0	0	116	133	0.59	52	58	2	1	1	1
746	1.04	82	1	18.3	2	104	46	0	4.16	89	75	0	5.06	1	30.85	-0.89	2.56	4.08	0	0	0	64	157	0.41	59	13	1	1	1	1
747	1.08	81	1	27.33	2	158	80	1	4.09	45	94	0	4.83	0	73.16	-0.09	2.89	3.5	1	1	0	60	125	0.91	33	18	3	1	1	1
748	1.06	95	2	21.44	0	131	56	1	4.56	31	78	0	4.65	0	35.67	-0.82	3.43	2.48	0	0	0	96	105	0.44	12	31	1	1	1	1
749	0.87	76	2	19.06	0	171	85	0	4.83	38	181	0	4.68	0	60.17	0.36	2.48	4.16	0	0	0	125	108	1.44	64	12	4	1	1	0
750	0.83	83	1	17.13	0	96	56	0	3.76	48	83	0	5.16	1	72.64	-0.46	2.64	2.3	0	0	0	43	174	0.63	10	14	2	1	1	1
751	0.87	89	2	19.19	0	148	80	0	4.72	37	79	0	4.61	0	57.64	-0.2	2.4	3.04	0	0	0	112	100	0.82	21	11	3	1	1	0
752	0.85	72	2	21.22	0	169	106	1	5.29	49	181	0	4.69	0	67.11	-0.58	1.79	2.77	0	0	0	198	109	0.56	16	6	2	0	0	1
753	1.25	78	1	19.49	0	102	60	0	4.22	33	83	0	4.77	0	55.01	-0.63	3.64	3.47	0	0	0	68	118	0.53	32	38	1	1	1	0
754	0.74	68	1	13.94	0	92	62	0	4.08	47	53	0	4.61	0	77.49	-1.43	3.3	2.2	0	0	0	59	100	0.24	9	27	1	1	1	0
755	0.86	94	1	26.04	0	124	60	1	4.42	58	123	0	4.84	0	31.43	-0.14	2.83	3.47	0	0	0	83	126	0.87	32	17	3	1	1	1
756	0.72	78	2	19.86	0	136	89	1	5.23	34	149	0	5.32	1	75.61	-0.26	2.08	3.09	1	1	0	186	204	0.77	22	8	3	1	1	1
757	0.93	75	1	17.23	0	172	86	0	4.44	79	126	0	4.94	0	69.63	-0.39	3	3.78	0	0	0	85	140	0.68	44	20	2	0	0	0
758	0.86	85	2	24.5	0	144	88	0	4.14	41	157	0	4.6	0	33.25	-1.27	2.2	2.3	1	1	0	63	99	0.28	10	9	1	1	1	0
759	0.77	86	2	19.2	0	148	70	1	4.72	46	71	0	5.08	0	55.28	-0.67	3.76	3.18	0	0	0	112	160	0.51	24	43	1	1	1	1
760	1	88	2	15.84	0	81	57	1	3.95	53	74	0	4.88	0	66.02	0.33	2.2	2.3	1	1	0	52	131	1.39	10	9	4	1	1	1
761	0.89	79	2	26.62	0	150	86	0	4.14	46	106	0	4.62	0	79.51	0.31	2.89	2.3	1	1	0	63	101	1.37	10	18	4	1	1	0
762	0.87	67	2	25.54	0	161	100	0	3.64	56	115	0	4.68	0	85.19	-0.26	2.64	2.3	0	0	0	38	108	0.77	10	14	3	0	0	0
763	1.81	82	1	21.51	3	151	102	1	3.43	45	52	0	4.49	0	35.32	-0.17	2.3	2.56	1	1	0	31	89	0.84	13	10	3	1	1	1
764	0.9	70	1	21.56	0	126	75	1	4.37	64	85	0	4.95	0	47.59	0.29	3.04	3.47	0	0	0	79	141	1.34	32	21	4	1	1	1
765	0.75	75	2	19.03	0	123	71	0	4.25	50	90	1	4.66	0	71.2	-0.78	2.89	3.04	0	0	0	70	106	0.46	21	18	1	1	1	1
766	1.12	96	2	14.69	0	135	94	1	4.04	69	101	0	4.77	0	66.63	-0.16	3.71	2.89	1	1	0	57	118	0.85	18	41	3	1	0	1
767	1.06	87	1	24.17	0	159	63	1	4.75	59	94	0	4.96	0	44.39	-0.78	2.48	2.94	1	1	0	116	143	0.46	19	12	1	1	1	1
768	0.87	66	2	22.32	0	115	64	0	4.56	42	135	0	4.37	0	78.34	0.11	2.56	3.14	1	1	0	96	79	1.12	23	13	4	0	0	0
769	1.3	83	2	17.58	0	146	63	1	5.13	56	98	0	4.85	1	42.98	-1.08	3.4	3.09	1	1	0	169	128	0.34	22	30	1	1	1	1
770	1.2	86	1	22.72	0	91	64	1	4.48	57	72	0	4.78	0	69.07	-0.73	2.64	3	1	1	0	88	119	0.48	20	14	1	1	1	1
771	1.06	73	1	21.41	1	140	90	1	4.55	86	145	0	4.95	0	56.32	-0.62	1.95	3.14	1	1	0	95	141	0.54	23	7	1	1	1	1
772	0.95	75	2	21.45	0	131	82	0	4.96	49	106	0	4.88	0	55.45	0.63	3.04	2.83	0	0	0	143	132	1.88	17	21	4	1	1	0
773	1.03	64	1	24.67	2	198	107	1	5.22	69	92	0	5.1	1	77.55	-0.43	3.66	4.38	1	1	0	185	164	0.65	80	39	2	1	1	1
774	1.04	79	2	24.41	0	207	85	0	4.78	66	117	0	4.99	1	73.2	-0.58	3.47	3.18	1	1	0	119	147	0.56	24	32	2	1	1	1
775	0.86	71	1	29.89	0	139	85	0	4.92	48	121	0	4.56	0	52.31	-0.62	3.56	3.43	1	1	0	137	96	0.54	31	35	1	0	0	0
776	0.88	68	1	23.95	2	157	77	0	5.21	39	140	0	4.76	0	64.14	-0.69	2.64	3.04	1	1	0	183	117	0.5	21	14	1	1	1	0
777	1.11	92	1	22.47	0	98	62	0	4.62	39	107	0	5.06	0	60.91	-0.51	3.14	3.97	0	0	0	101	158	0.6	53	23	2	1	1	0
778	1	89	2	21.42	0	113	56	0	4.34	74	112	0	4.42	0	52.52	0.14	2.56	2.3	0	0	0	77	83	1.15	10	13	4	1	1	0
779	0.87	81	2	22.68	0	184	88	0	4.43	48	113	0	5.37	1	67.24	0.18	2.89	2.71	0	0	0	84	215	1.2	15	18	4	1	1	1
780	1.06	88	1	18.56	3	125	70	1	4.64	41	152	0	4.6	0	40.74	-0.07	2.64	2.64	1	1	0	104	99	0.93	14	14	3	1	1	1
781	0.9	78	2	24.68	0	141	82	0	4.72	56	134	0	4.6	0	67.69	-0.36	2.48	2.77	1	1	0	112	99	0.7	16	12	3	1	1	0
782	0.77	80	2	18.23	0	149	88	1	3.91	88	97	1	5	0	46.14	0.03	2.83	3.18	0	0	0	50	148	1.03	24	17	4	0	0	1
783	0.69	64	1	17.35	0	119	85	0	4.62	47	62	0	5.76	1	79.69	-0.6	2.64	3.3	0	0	0	102	318	0.55	27	14	2	0	0	1
784	0.93	75	2	27.59	0	145	69	0	4.61	49	83	0	4.93	0	69.45	-0.8	2.56	2.2	0	0	0	100	138	0.45	9	13	1	0	0	0
785	1.19	75	2	25.07	0	133	59	1	4.25	37	94	0	4.92	0	72.33	-0.49	2.64	2.64	0	0	0	70	137	0.61	14	14	2	1	1	1
786	0.86	86	2	27.62	0	157	76	1	4.33	50	82	1	4.88	0	53.64	-1.11	2.56	2.56	0	0	0	76	131	0.33	13	13	1	1	1	1
787	1.27	92	2	21.74	0	171	89	1	4.33	34	79	0	4.93	0	45.27	-0.25	1.79	2.56	0	0	0	76	138	0.78	13	6	3	1	1	1
788	0.98	83	1	19.63	2	108	66	0	4.51	82	144	0	4.45	0	69.35	-0.78	3	3.74	1	1	0	91	86	0.46	42	20	1	1	1	0
789	1.04	94	2	23.58	0	131	70	1	4.63	40	111	0	4.66	0	30.9	-0.78	3.22	2.89	0	0	0	103	106	0.46	18	25	1	1	1	1
790	0.81	86	2	24.65	0	132	81	1	4.2	58	144	0	4.58	0	35.48	-0.62	3.04	3.04	0	0	0	67	98	0.54	21	21	2	1	1	1
791	0.82	86	2	17.84	0	128	78	1	5.51	63	80	0	4.53	0	37.05	-0.84	3.58	4.04	1	0	1	247	93	0.43	57	36	1	1	1	1
792	1.19	93	2	26.81	0	130	57	1	4.81	32	116	0	4.69	0	63.06	-0.73	2.3	2.83	1	1	0	123	109	0.48	17	10	1	1	1	1
793	0.9	86	1	20.95	3	163	84	0	5.01	73	143	0	5.21	1	53.86	0.18	2.89	3.74	0	0	0	150	183	1.2	42	18	4	1	1	1
794	0.97	87	2	26.86	0	139	80	1	4.52	43	144	0	4.76	0	45.66	-0.02	3	3.04	0	0	0	92	117	0.98	21	20	4	1	1	1
795	0.84	70	2	18.19	0	161	78	1	4.26	40	100	0	4.79	0	76.17	-0.6	2.64	3.14	0	0	0	71	120	0.55	23	14	2	1	1	1
796	1.18	77	2	19.89	0	101	70	1	4.3	38	65	0	5.05	0	74.24	0.32	2.3	2.56	1	1	0	74	156	1.38	13	10	4	1	1	1
797	0.99	89	2	24.49	0	134	65	1	4.11	64	151	0	4.82	0	68.66	0.39	1.79	2.3	1	1	0	61	124	1.47	10	6	4	1	1	1
798	1.03	85	1	25.95	3	132	80	1	4.57	101	79	0	4.72	0	38.3	0.21	2.4	3.61	1	1	1	97	112	1.23	37	11	4	1	1	1
799	0.83	83	2	18.42	0	160	75	0	3.76	54	141	0	4.44	0	54.78	0.15	2.4	3.18	0	0	0	43	85	1.16	24	11	4	0	0	0
800	1.18	81	1	18.52	3	109	62	0	4.3	54	73	0	5.19	1	44.05	0.27	2.56	3.53	1	0	1	74	179	1.31	34	13	4	1	1	1
801	0.41	74	2	14.08	0	106	57	0	4.93	61	70	0	4.04	0	72.45	-0.53	2.3	2.3	0	0	0	138	57	0.59	10	10	2	0	0	0
802	0.78	82	2	25.78	0	160	100	0	4.41	55	137	0	4.37	0	75.56	-0.39	1.79	2.3	0	0	0	82	79	0.68	10	6	3	1	1	0
803	1.05	86	2	16.86	0	147	120	0	3.87	39	55	0	4.92	0	67.32	-0.99	1.39	2.4	0	0	0	48	137	0.37	11	4	1	1	1	0
804	1	96	1	19.29	0	150	91	0	3.74	70	67	0	4.62	0	66.34	-0.42	1.79	3	1	1	0	42	101	0.66	20	6	2	1	1	0
805	0.77	85	2	18.87	0	186	98	0	4.37	70	51	0	4.97	0	54.83	-0.73	1.95	3.18	1	1	0	79	144	0.48	24	7	1	1	1	0
806	0.83	81	1	21.99	3	133	91	0	4.5	56	101	0	4.71	0	50.91	0.12	2.56	4.11	0	0	0	90	111	1.13	61	13	4	1	1	0
807	0.87	82	2	15.56	0	121	75	1	4.7	55	135	0	5.15	0	43.81	-1.24	2.48	3.56	0	0	0	110	173	0.29	35	12	1	1	1	1
808	1.03	90	2	23.4	0	147	82	1	4.22	48	100	0	4.8	0	62.21	-0.73	2.77	2.71	1	0	1	68	122	0.48	15	16	1	1	1	1
809	1.16	76	1	22.39	2	174	74	0	4.91	58	163	0	4.51	0	76.83	-0.51	2.71	2.89	1	1	0	136	91	0.6	18	15	2	1	1	0
810	0.86	77	2	26.01	0	117	55	1	5.23	70	83	0	4.6	0	64.79	-0.76	3.3	2.77	1	1	0	186	99	0.47	16	27	1	1	1	1
811	0.83	87	2	15.75	0	121	80	1	3.81	66	76	0	4.93	0	66.13	-0.78	2.48	3.09	0	0	0	45	139	0.46	22	12	1	1	1	1
812	0.91	74	2	21.56	0	106	70	0	4.04	57	94	0	4.64	0	74.06	-0.26	2.4	2.2	0	0	0	57	104	0.77	9	11	3	0	0	0
813	0.74	96	2	14.69	0	157	83	1	3.93	63	104	0	4.62	0	64.57	-0.22	2.71	2.2	1	1	0	51	102	0.8	9	15	3	1	1	1
814	1.76	90	2	25.8	0	176	70	1	4.25	54	115	0	4.78	1	64.08	-0.06	3.95	2.89	1	1	0	70	119	0.94	18	52	4	1	1	1
815	0.91	79	1	29.96	3	155	77	0	4.63	48	149	0	5.31	0	52.79	0.44	3.56	3.93	0	0	0	103	202	1.56	51	35	4	1	1	0
816	0.78	78	1	25.54	3	182	66	1	4.47	59	81	0	5.19	1	31.85	-0.51	2.64	3.69	1	1	1	87	179	0.6	40	14	2	1	1	1
817	0.9	89	2	26.63	0	103	55	0	3.99	84	88	0	4.57	0	71.93	-0.43	3.04	3.3	1	1	0	54	97	0.65	27	21	2	1	1	0
818	1.24	67	1	22.43	3	158	56	1	4.82	42	53	0	5.15	1	74.02	-0.34	2.48	3.22	1	1	0	124	173	0.71	25	12	2	1	1	1
819	0.87	86	2	19.39	0	165	86	1	3.76	64	128	0	4.73	0	68.07	-0.33	2.48	2.64	0	0	0	43	113	0.72	14	12	3	1	1	1
820	1.08	64	1	24.77	3	160	82	1	5.06	46	166	0	4.98	0	60	-0.21	2.56	3.18	1	1	0	158	145	0.81	24	13	3	1	1	1
821	0.92	78	2	22.23	0	142	93	1	4.62	73	124	1	4.93	0	72.42	-0.62	2.64	2.48	0	0	0	101	138	0.54	12	14	2	0	0	1
822	1.2	75	1	22.61	3	199	102	1	5.51	39	147	0	5.41	1	79.96	0.08	2.94	3.53	0	0	1	246	224	1.08	34	19	4	1	1	1
823	1.13	83	2	20.26	0	138	58	1	4.37	65	110	0	4.88	0	33.39	-0.27	1.39	2.3	1	1	1	79	131	0.76	10	4	3	1	1	1
824	1.02	74	1	26.95	3	130	83	1	5.72	42	139	0	5.27	1	72.29	-0.53	3.37	4.22	0	0	0	305	194	0.59	68	29	2	1	1	1
825	0.79	82	2	20.25	0	146	83	1	4.01	80	168	0	4.48	0	54.35	-0.15	1.1	3.09	1	1	0	55	88	0.86	22	3	3	1	1	1
826	0.87	81	2	15.3	0	137	88	1	4.22	69	105	0	4.58	0	53.94	-0.39	3.04	2.71	1	1	0	68	98	0.68	15	21	3	1	1	1
827	0.91	92	2	25.31	0	145	72	1	4.77	42	72	1	5.39	0	35.52	-0.99	2.08	2.08	0	0	0	118	219	0.37	8	8	1	1	1	1
828	0.87	73	2	25.72	0	172	93	0	4.87	59	153	0	4.72	0	61.51	-0.16	2.56	3.3	0	0	0	130	112	0.85	27	13	3	1	1	0
829	1.06	87	1	20.51	0	114	62	1	4.11	45	73	0	4.98	0	71.57	0.05	2.3	2.3	0	0	0	61	146	1.05	10	10	4	1	1	1
830	1	80	1	20.54	0	138	84	0	3.83	75	53	0	4.42	0	84.62	0.68	2.71	3.18	0	0	0	46	83	1.98	24	15	4	1	1	0
831	1.02	84	2	14.15	0	152	80	0	4.01	75	72	0	4.67	0	54.39	-1.02	2.48	3.47	1	1	0	55	107	0.36	32	12	1	1	1	0
832	0.96	76	2	30.03	0	114	90	0	4.82	28	64	0	4.73	0	55.06	-0.46	3.22	4.11	0	0	0	124	113	0.63	61	25	2	1	1	0
833	1.34	93	2	16.49	0	127	71	0	4.56	54	116	0	4.53	0	63.06	-0.58	1.79	2.77	1	1	1	96	93	0.56	16	6	2	1	1	0
834	0.97	79	1	17.51	0	90	43	0	4.49	26	117	0	5.3	0	49.45	-0.54	2.89	2.94	0	0	0	89	201	0.58	19	18	2	1	1	0
